1 **TITLE:** Fine-tuned repression of Drp1 driven mitochondrial fission primes a slow cycling  
2 stem/progenitor-like state towards accelerating neoplastic transformation of  
3 keratinocytes

4  
5 **AUTHORS:** Spurlock B<sup>1</sup>, Parker D<sup>1</sup>, Basu MK<sup>2</sup>, Hjelmeland A<sup>3</sup>, G Sajina<sup>3</sup>, Liu S<sup>1</sup>, Siegal  
6 G<sup>2</sup>, Gunter A<sup>1</sup>, Moran A<sup>1</sup> and Mitra K<sup>1\*</sup>

7  
8 \* corresponding author (kasturi@uab.edu)

9  
10 **AFFILIATION:**

- 11  
12 1. Department of Genetics, University of Alabama at Birmingham,  
13 Birmingham, Alabama 35294  
14 2. Department of Pathology, University of Alabama at Birmingham,  
15 Birmingham, Alabama 35294  
16 3. Department of Cell Development and Integrative Biology, University of Alabama  
17 at Birmingham,  
18 4. Department of Biology, University of Alabama at Birmingham.

19  
20 **Running title:**

21 Mitochondria based priming of stem/progenitor-like state towards driving transformation

22  
23 **Keywords:**

24 Drp1, Mitochondrial fission, neoplastic stem/progenitor cells, neoplastic transformation,  
25 keratinocytes, scRNA-seq, microscopy

26  
27  
28  
29  
30  
31

32 **ABSTRACT:**

33

34 The opposing processes of mitochondrial fission and fusion are emerging as crucial  
35 regulators of stem cells. Stem/progenitor cells maintaining repressed mitochondrial  
36 fission appear to be primed for self-renewal and proliferation. Here, we demonstrate the  
37 causative role of fine-tuned repression of Drp1, the master regulator of mitochondrial  
38 fission, in establishing a stem/progenitor-like state towards supporting carcinogen  
39 (TCDD) driven neoplastic transformation of keratinocytes. Fine-tuned Drp1 repression  
40 maintains small networks of fused mitochondria to sustain a unique gene-expression  
41 profile with elevated stem/progenitor cell functional markers (Krt15, Sox2 etc) and their  
42 regulators (Cyclin E). Cells with this mitochondria-primed state are slow cycling,  
43 susceptible to transformation, and when enriched by mild carcinogen exposure sustains  
44 elevated self-renewal/proliferation to form less differentiated tumors. More complete  
45 Drp1 repression sustains larger hyperfused mitochondria, represses lineage specific  
46 stem/progenitor genes and prevents transformation. Therefore, our data highlights a  
47 'goldilocks' level of Drp1 repression that supports stem/progenitor cell dependent  
48 neoplastic transformation. Future studies would reveal if bodily stresses causing mild  
49 Drp1 repression could enrich this mitochondria-primed stem/progenitor like population in  
50 tissues making them vulnerable to neoplastic transformation.

51

52

53

54

55

56

57

58

59

60

61

62

## 63 INTRODUCTION

64

65 Mitochondria play various key roles in stem cell regulation, while their involvement is  
66 complex (Lisowski, Kannan et al., 2018)(Khacho & Slack, 2017, Zhang, Menzies et al.,  
67 2018). The critical details of mitochondrial involvement in regulation of various stem cell  
68 properties are far from clear. The master regulators of mitochondrial fission and fusion  
69 processes are emerging as crucial regulators of both embryonic and adult stem cells  
70 (Khacho & Slack, 2017, Lisowski et al., 2018)(Spurlock, Tullet et al., 2020). The  
71 Dynamin Related Protein 1 (Drp1) is the master regulator of mitochondrial fission that  
72 breaks larger mitochondria into smaller elements(Friedman & Nunnari, 2014,  
73 Kageyama, Zhang et al., 2011). The effects of Drp1 driven mitochondrial fission is  
74 opposed by fusion between mitochondria driven by the Mitofusins and Opa1(Chen &  
75 Chan, 2017)(Schrepfer & Scorrano, 2016). Therefore, Drp1 repression allows  
76 unopposed mitochondrial fusion to sustain a hyperfused mitochondrial state. The other  
77 extreme state, i.e. unopposed mitochondrial fission, is critical for achieving pluripotency  
78 of stem cells during reprogramming (Prieto, Leon et al., 2016). However, sustained  
79 mitochondrial fission reduces pluripotency of stem cells (Zhong, Cui et al., 2019). Thus,  
80 a balance of timely fission and fusion of mitochondria appears to be critical for  
81 maintaining stem cell properties.

82 Enhanced mitochondrial fusion sustains stemness of certain adult stem cells of  
83 neural, germ line and mammary lineages (Khacho, Clark et al., 2016, Senos Demarco,  
84 Uyemura et al., 2019, Wu, Chen et al., 2019). Particularly, repression of Drp1 supports  
85 stemness and repression of Mitofusin or Opa1 inactivates stemness in adult mouse  
86 neural lineage (Iwata, Casimir et al., 2020, Khacho & Slack, 2017). In various tumors,  
87 the bulk tumor cell populations are maintained by the adult neoplastic stem cells (also  
88 called tumor initiating cells) as they self-renew, proliferate and differentiate (Magee,  
89 Piskounova et al., 2012). Drp1 has been linked to tumor formation in various cancer  
90 types (Nagdas, Kashatus et al., 2019, Serasinghe, Wieder et al., 2015, Tanwar, Parker  
91 et al., 2016, Tsuyoshi, Orisaka et al., 2020, Xie, Wu et al., 2015). Drp1 activation  
92 sustains neoplastic stem cells at least in the astrocytic lineage (Xie et al., 2015).

93 Although various mechanisms and pathways have been proposed towards modulation

94 of stem cell properties by mitochondrial fission and fusion regulators, no common theme  
95 has yet emerged.

96         Given that stem cells exhibit plasticity at various levels, a detailed understanding  
97 of various states of these cells is an important area of investigation (Magee, Piskounova  
98 et al., 2012)(Folmes, Dzeja et al., 2012). We found that select neoplastic ovarian  
99 epithelial stem cells (marked by Aldh) have lower levels of mitochondrial fission and can  
100 convert to a state of elevated mitochondrial fission when self-renewal and proliferation is  
101 activated (Spurlock et al., 2019)(Spurlock et al., 2021b). Importantly, the cells with  
102 minimum mitochondrial fission were found within a neoplastic stem cell sub-population  
103 that has >10 folds self-renewal and proliferation ability compared to the other neoplastic  
104 stem cell subpopulation (Spurlock et al., 2019)(Spurlock et al., 2021b). Thus, we  
105 proposed, that a repressed mitochondrial fission state may prime neoplastic stem cells  
106 towards maximizing their potential of self-renewal and proliferation. Similar priming was  
107 demonstrated in a normal hematopoietic stem cell subpopulation that maintains Drp1  
108 repression (Liang, Arif et al., 2020). However, the causative role of Drp1 in mitochondria  
109 driven priming of stem cell self-renewal/proliferation remains to be investigated.  
110 Nonetheless, an elevated mitochondrial fusion state, sustained by mitofusin, was shown  
111 to drive immortalization of neoplastic stem cells to support tumorigenesis in a  
112 *Drosophila* model (Bonney, Veloso et al., 2020). Therefore, it is important to study the  
113 detailed involvement of mitochondrial fission and fusion in the mitochondria based  
114 priming of stem cell self-renewal and proliferation.

115         Here, we investigated involvement of Drp1 in mitochondria based priming of  
116 stemness during neoplastic transformation of skin cells. Skin stem cells sustain the  
117 regenerative capacity of the organ and thus serve as an excellent model for adult stem  
118 cells (Fuchs, 2016), while the role of Drp1 remains largely unknown in this system.  
119 Therefore, we took the first step of detailed investigation of the spontaneously  
120 immortalized skin keratinocyte cell line, HaCaT, which has been widely used to model  
121 the basic organization of skin and how carcinogens impact it (Boelsma, Verhoeven et  
122 al., 1999, Jung, Jung et al., 2016, Schoop, Mirancea et al., 1999). The HaCaT cells  
123 carry a non-functional p53 (St John, Sauter et al., 2000), which provides the appropriate  
124 cellular context given Drp1 inactivation increases cell proliferation in the absence of

125 active p53 (Mitra, Rikhy et al., 2012, Mitra, Wunder et al., 2009). Here, we tested if Drp1  
126 repression is involved in mitochondria based priming of stem cells towards driving  
127 neoplastic transformation.

128

## 129 **RESULTS AND DISCUSSION**

130

### 131 **Keratinocytes transformed under mild carcinogenic stress exhibit attenuated** 132 **Drp1 activity and have abundant self-renewing/proliferating cells**

133 The potent carcinogenic impact of the chemical carcinogen 2,3,7,8-  
134 tetrachlorodibenzodioxin (TCDD), an environmental pollutant, has been widely studied  
135 on the HaCaT line as well as on skin tissue (Wincent, Bengtsson et al., 2012)(Hao, Lee  
136 et al., 2012)(Ray & Swanson, 2004)(Mulero-Navarro & Fernandez-Salguero, 2016)(Der  
137 Vartanian, Quetin et al., 2019). We used both mild and strong dose of TCDD to  
138 uncover any possibility of mitochondria based stemness priming during TCDD driven  
139 neoplastic transformation. TCDD driven carcinogenesis is largely caused by activation  
140 and upregulation of the aryl hydrocarbon receptor (AHR) (Mulero-Navarro & Fernandez-  
141 Salguero, 2016) (Leclerc, Staats Pires et al., 2021). Exposure to milder (T-1nM) and  
142 stronger (T-10nM) doses of TCDD causes a comparable increase in cell proliferation of  
143 HaCaT cells within 3 weeks of standard TCCD driven transformation protocol, with  
144 Toluene used as the vehicle control (Fig. 1A). The stable transformed colonies of  
145 TCDD-1nM (TF-1) and TCDD-10nM (TF-10) maintain comparable upregulation of AHR,  
146 even in the absence of TCDD (Fig. 1B). Unlike the parental HaCaT cells (Parental),  
147 both transformed cells are able to form subcutaneous xenograft tumors, confirming their  
148 transformation status (Extended. Fig. 1A). Interestingly, pathological evaluation of H&E  
149 stained tumor sections revealed that the TF-1 cells gave rise to malignant tumors  
150 harboring less differentiated (primitive) squamous cells with large nuclei (blue) and little  
151 visible cytoplasm (pink) (Fig. 1C, left). Whereas the TF-10 cells formed tumors  
152 harboring differentiated stratified squamous epithelium with cells having expansion of  
153 cytoplasm (Fig. 1C, right); the clear gaps represent artifacts secondary to cryo-  
154 sectioning.

155           Given the above differences between the TF-1 and TF-10 populations, we  
156 probed for any difference in Drp1 and mitochondrial shape, as well as self-renewal and  
157 proliferation abilities between them and the non-transformed Parental population.  
158 Among the major molecules regulating mitochondrial fission and fusion (Drp1, Mfn1,  
159 Mfn2, Opa1), Drp1 exhibited the most prominent differences (Fig. 1D). Particularly, the  
160 TF1 population has markedly lower levels of the cell cycle regulated activating  
161 phosphorylation of Drp1 (pDrp1-S616), while both the transformed populations have  
162 higher levels of Drp1 protein compared to the Parental line (Fig. 1D). The TF-1  
163 population also has lower levels of other tested mitochondrial markers (Tom20,  
164 Cytochrome C and Fis1), compared to the TF-10 population (Extended Fig. 1B). Next,  
165 to assess the steady state contribution of mitochondrial fission and fusion on  
166 mitochondrial shape we quantified mitochondrial [Fission] and [Fusion5] metrics in  
167 individual live cells stably expressing the fluorescent mitochondrial reporter, mitoPSmO  
168 (Spurlock et al., 2019)(Spurlock et al., 2021b) (Fig. 1E). In comparison to the TF-1 and  
169 Parental populations, the TF-10 population exhibits reduced levels of the [Fusion5]  
170 metric and slightly elevated level of the [Fission] metric (Fig. 1F). Notably, although the  
171 TF-1 population has higher median [Fusion5], lower range of [Fusion5] is also detected  
172 in this population (Fig. 1F). Since the [Fusion5] metric reflects mitochondrial length in  
173 each cell (Spurlock et al., 2019), this data suggests a wider range of mitochondrial  
174 length in the TF-1 population, which could be potentially brought about by regulating  
175 Drp1 driven mitochondrial fission (Fig. 1D).

176           Drp1 repression brings about a p53 dependent cell cycle block (Mitra et al.,  
177 2009), and can increase cell proliferation in the absence of functional p53 (Parker, Iyer  
178 et al., 2015)(Mitra et al., 2012). Consistent with this, the TF-1 HaCaT population with  
179 inactive p53 status (St John et al., 2000) and low levels of active Drp1 (Fig. 1D) have  
180 significantly higher *in vitro* cell proliferation rate, compared to the Parental and the TF-  
181 10 population (Fig 1G). Furthermore, the TF-1 population form markedly larger  
182 spheroids in conditions that support self-renewal and proliferation, in comparison to  
183 those formed by the Parental or the TF-10 population (Fig. 1H). More importantly, ELDA  
184 statistics applied on spheroid formation assay for determination of *in vitro* stem cell  
185 frequency (Hu & Smyth, 2009) demonstrated that the TF-1 population has double the

186 abundance of self-renewing/proliferating cells than the TF-10 population, while their  
187 abundance is one order higher in both transformed populations compared to the  
188 Parental (Fig. 1I).

189 In summary, the above data demonstrate that keratinocytes transformed with low  
190 dose of the potent carcinogen, TCDD, maintain attenuated Drp1 activity ([Drp1]-att),  
191 greater self-renewal/proliferative ability and form less differentiated tumors compared to  
192 those transformed by a 10-fold higher TCDD dose. Thus, we conclude that the [Drp1]-  
193 att TF-1 keratinocyte population is enriched in neoplastic stem/progenitor cells.

194

### 195 **Drp1 attenuated TF-1 keratinocyte population maintains an expanded slow-** 196 **cycling sub-population with elevated stem/progenitor cell markers**

197 Single cell methods, particularly single-cell-RNAseq (scRNA-seq), are widely  
198 used to identify and characterize distinct cellular states in a given cell population  
199 (Luecken & Theis, 2019). To identify and define the neoplastic stem cells of the Drp1  
200 attenuated TF-1 population, we performed scRNA-seq of the Parental and the  
201 transformed populations. Cell clustering in a UMAP plot shows 6 clusters within  
202 Parental, TF-1 and TF-10 populations (Fig. 2A, Clusters 0-5). While Cluster 4 is reduced  
203 in both transformed populations in comparison to the Parental, the TF-1 population  
204 exhibits a marked expansion of Cluster 3 and reduction of Cluster 5 (Fig. 2A, Extended.  
205 Fig.2A, left panel). These results also hold true with the lowest cluster resolution  
206 (Extended. Fig. 2B. arrows). Heat map of cluster markers altered by at least 1.5 folds  
207 ( $p$ -adjusted  $<0.0001$ ) shows that Clusters 2,3 and 4 are marked by upregulation of  
208 distinct genes while Cluster 5 is marked by overall downregulation of various genes  
209 (Extended Fig. 2C, Extended. Data Table 1). From here, we identified the top most  
210 candidate genes to mark each cluster (color coded arrows in Extended Fig. 2C). Indeed,  
211 the neoplastic stem/progenitor cell enriched Drp1-att TF-1 population shows  $>3$ -fold  
212 upregulation of the epidermal stem cell marker Krt15 (Giroux, Lento et al., 2017,  
213 Gonzales & Fuchs, 2017, Purba, Haslam et al., 2014) and of the neoplastic stem cell  
214 markers for skin carcinomas, SOX2 and SOX4 (Boumahdi, Driessens et al., 2014,  
215 Foronda, Martinez et al., 2014) (Fig. 2B, arrow). Since the markers increase across all  
216 TF-1 clusters, with maximum levels in Cluster 3, we conclude that the TF-1 population

217 exhibits upregulation of the stem/progenitor markers independent of their cluster  
218 distribution. On the other hand, the other stem/progenitor cell markers, like Krt5, Krt14,  
219 Krt19 (Gonzales & Fuchs, 2017)(Karantza, 2011) are also enriched by ~2-fold in Cluster  
220 3, but comparably in all the three cell populations, as exemplified by Krt5 (Fig. 2B,  
221 arrow, Extended Data Table 1). Notably, among the 3 cell populations, TF-1 harbors  
222 markedly fewer cells in Cluster 3 having elevated levels of the differentiating cell marker  
223 Krt13 (Karantza, 2011). Cluster 5, reduced in TF-1 population, is marked by 1.5 to >2-  
224 fold reduced expression of 12 of the 13mtDNA genes in all the 3 cell populations  
225 (Extended Fig. 2D, arrow). Cluster 4, reduced in both transformed populations, is  
226 marked by >8-fold upregulation of OASL, a gene involved in the interferon pathway, in  
227 all the three cell populations (Extended Fig. 2E).

228         Since flow cytometry on PI stained cells revealed modest differences in cell cycle  
229 distribution between the Parental and transformed populations (Extended. Fig. 2A, right  
230 panel), we asked if the scRNA-seq derived clusters represent distinct cell cycle phases.  
231 Therefore, we performed the standard gene set enrichment analyses (GSEA) of the  
232 overall cluster marker profiles using the REACTOME pathway database (Subramanian,  
233 Tamayo et al., 2005) (Extended. Data Table 2). Some of the statistically significant  
234 pathways (q value <0.01) were renamed based on the leading-edge genes of the  
235 identified pathways. GSEA showed upregulation of genes in “Mitosis and Relevant  
236 Cytoskeletal Proteins” in Cluster 2 and that of genes in “DNA repair / replication and  
237 Histones” in Cluster 0 (Fig. 2C); Cluster 1 has downregulation of “Histones and Ubiquitin  
238 related” genes. Indeed, the mitotic Cyclin B and its partner kinase CDK1, as well as  
239 Cyclin A are markedly higher in Cluster 2-G2-M, while PCNA, which peaks early in S  
240 phase (Maga & Hubscher, 2003, Zerjatke, Gak et al., 2017) is highest in Cluster 0-S-  
241 Histone-hi in all 3 cell populations (Fig. 2D); the S phase cyclins E1/E2 and their partner  
242 CDK2 were not detected in our sc-RNAseq data set. Surprisingly, Cluster 3 (positively  
243 marked by Krt15) has dramatic downregulation of genes in “Overall Cell Cycle” as well  
244 as the above categories representing distinct cell cycle phases (Fig. 2C), suggesting  
245 their cell cycling is slow. This is reflected in dramatic low levels of cyclins in Cluster 3-  
246 SloCycl-Krt15-hi in all three cell populations, most prominently in TF-1 (Fig. 2D). More  
247 importantly, the levels of PCNA, whose transcripts are dramatically reduced in



248 quiescent cells (Maga & Hubscher, 2003, Zerjatke, Gak et al., 2017), is markedly  
249 reduced in the SloCycl-Krt15-hi cluster (and others) only in the TF-1 population (Fig.  
250 2D). This cluster indeed has upregulation of genes involved in “Keratin” and “Signaling”  
251 pathways. Notably, the Notch pathway target, Hes1, which actively maintains  
252 quiescence (Sang, Coller et al., 2008) (Moriyama, Durham et al., 2008), is upregulated  
253 across the clusters in the TF-1 population (Extended Fig. 2E). These data strongly  
254 suggest that the enrichment of the SloCycl-Krt15-hi cluster in the TF-1 population  
255 happens due to active maintenance of quiescence, rendering them slow cycling. Cluster  
256 4 does not relate to cell cycle and shows upregulation of genes related to “Cytokine”  
257 (interferons) pathway (Fig. 2C), many of which are suppressed by AHR activation (Di  
258 Meglio, Duarte et al., 2014) (Extended. Data Table 1). Thus, comparable upregulation of  
259 AHR in both transformed populations (Fig. 1B) could explain their comparable reduction  
260 of Cluster 4 (Fig. 2A). The downregulated mtDNA genes in Cluster 5 were identified as  
261 “TCA cycle” and “Complex 1 biogenesis” in our overrepresentation analyses (\* in Fig.  
262 2C), but not in GSEA. Towards understanding the entry into the slow cycling state of the  
263 Krt15hi-Cluster 3, we performed trajectory analyses using Slingshot algorithm that  
264 identifies clusters related to each other based on their gene expression (Street *et al*,  
265 2018). The output trajectory was the following: “G2-M” to “S-Histones-hi” to “Cytokine”  
266 to “Histones/Ub-lo” bifurcating into “SloCycl-Krt15-hi” or “mtDNA-lo” (Fig. 2C, open  
267 arrows, Extended. Fig. 2F). This implies that the cells in the TF-1 population may  
268 preferentially reside in the SloCycl-Krt15-hi cluster and not in the mtDNA-lo cluster, thus  
269 expanding the former and reducing the latter (Fig. 2A).

270         Given the above striking differences in cell cycle genes between the clusters, we  
271 quantified cell cycle distribution in each cluster in the Parental, TF-1 and TF-10  
272 populations. We used a Seurat algorithm that employs several validated predictive cell  
273 cycle genes to quantify G2-M and S scores, and assign cells in G2-M, S or in G1/G0  
274 (when both G2-M and S phase scores are low) (Tirosh *et al*, 2016). We found that the  
275 G2-M score is overall comparable between Parental and the transformed populations,  
276 while the TF-1 population has lower S score (Fig. 2E). Distribution of cell cycle phase  
277 across the clusters indeed corroborated the major conclusions from GSEA, namely  
278 Cluster 2 is abundant in G2-M cells, Cluster 0 (and 1) in S and Krt15 marked Cluster 3

279 is in G0/G1 (expected for quiescent/slow-cycling cells) (Fig. 2F,G). This data, taken with  
280 the lower levels of Histone transcripts in Cluster 1 than in Cluster 0 (\* in Fig. Extended  
281 2C) suggest that Cluster 0 is early S phase while Cluster 1 is late S phase. While the  
282 G2-M and S cells are equally abundant in all three cell populations, the expanded  
283 SloCycl-Krt15-hi cluster in the TF-1 population has significantly more cells in G0/G1 and  
284 less cells in S than the other two populations (Fig. 2F,G, arrows). On the other hand, the  
285 reduced mt-DNA-lo cluster in the TF-1 population has more cells in S and less in G0/G1  
286 population (Fig. 2F,G, arrows). Quantification of this reciprocal relationship of G1 and S  
287 distribution between Cluster 3 and 5 revealed that the G1 to S reciprocity between  
288 Cluster 3 and 5 is >5-fold in the TF-1 population with respect to the Parental and TF-10  
289 population (Fig. 2G, inset). This suggests that altered cell cycle regulation in the TF-1  
290 population may allow them to preferentially reside in the 3-SloCycl-Krt15-hi cluster and  
291 not in the 5-mtDNA-lo cluster. Such a regulation may involve attenuation of CDK1  
292 driven Drp1(S616) phosphorylation (Fig. 1D) due to marked reduction of CyclinB/CDK1  
293 particularly in the TF-1 population in late S phase (Fig. 2D), where decision for  
294 expansion of the slow cycling Krt15-hi cluster is likely made (Fig. 2C, Suppl Fig. 2F).

295 In summary, our sc-RNAseq data demonstrate that the [Drp1]-att TF-1  
296 keratinocyte population enriched with self-renewing cells maintain an expansion of slow  
297 cycling cells expressing high levels of stem/progenitor markers Krt15 (lineage specific)  
298 and Sox2 and Sox4 (general), likely due to altered cell cycle regulation. Consistent with  
299 our data, the Krt15+ epidermal stem cells are primarily slow cycling and when activated  
300 give rise to various epithelial cell types or contribute to epidermal carcinoma  
301 development (Giroux et al., 2017, Gonzales & Fuchs, 2017, Purba et al., 2014)(Morris,  
302 Liu et al., 2004)(Giroux et al., 2017). Moreover, the higher *in vitro* cell proliferation rate  
303 of the [Drp1]-att TF-1 keratinocytes (Fig. 1G) could result from the higher clonogenic  
304 capacity of the Krt15-hi cells (Morris et al., 2004)(Seykora & Cotsarelis, 2011).

305

### 306 **Fine-tuned repression of Drp1 sustains a [CyclinE<sup>hi</sup>-Sox2<sup>hi</sup>-Krt15<sup>hi</sup>] state and** 307 **accelerates carcinogen driven cell transformation**

308 Repression of Drp1 driven mitochondrial fission elevates stem/progenitor cell  
309 markers in mouse embryonic fibroblasts, and in cells of neural and ovarian epithelial

310 lineage (Iwata et al., 2020, Parker et al., 2015). In the epidermal lineage, Krt15+ self-  
311 renewing stem cells contribute to both skin regeneration and carcinoma development  
312 (Giroux et al., 2017, Gonzales & Fuchs, 2017, Purba et al., 2014), while Sox2  
313 upregulation in neoplastic stem/progenitor cells particularly supports skin carcinoma  
314 (Boumahdi et al., 2014, Siegle, Basin et al., 2014). We found that, in comparison to the  
315 Parental and TF-10 keratinocyte populations, Sox2 protein levels are dramatically  
316 higher in the Drp1 attenuated TF-1 population (Fig. 3A, Extended Fig. 3A), which are  
317 enriched for self-renewing cells, have higher in vitro cell proliferation rate and forms less  
318 differentiated tumors (Fig. 1). This also corroborates the elevated Sox2 transcript level  
319 seen across the scRNA-seq derived clusters in the TF-1 population (Fig. 2B). Krt15  
320 protein levels are elevated in both transformed populations in comparison to the  
321 Parental (Fig. 3A), unlike the cluster specific differences in transcript levels (Fig. 2B).  
322 We did not detect any increase in other embryonic stem cell markers like Oct4 or Nanog  
323 in the TF-1 population (Extended Fig. 3A). Immunostaining based co-expression  
324 analyses of Sox2 and Krt15 in individual cells revealed that only a subpopulation of  
325 Drp1 attenuated TF-1 population has elevation of both Krt15 and Sox2 (Fig. 3B,  
326 Extended. Fig. 3B). Similar analyses showed that the highest levels of Sox2 in the TF-1  
327 population is sustained in cells with an intermediate level of Drp1 protein levels (Fig. 3C)  
328 and lower pDrp1(S616) levels (indicative of lower Drp1 activity) (Fig. 3D). Therefore, we  
329 investigated whether repression of Drp1 in the Parental cells may cause the elevation of  
330 Sox2 and/or Krt15 observed in the TF-1 population derived from the Parental cells (with  
331 carcinogen treatment). To that end, we knocked down Drp1 expression in Parental  
332 keratinocytes with two validated Drp1 shRNAs (Parker et al., 2015, Tanwar et al., 2016),  
333 one weaker (W), and the other with 5 folds stronger Drp1 knockdown efficacy (S) almost  
334 mimicking Drp1 genetic ablation (Fig. 3E). Surprisingly, while weaker Drp1 knockdown  
335 elevates Krt15 levels, while the stronger Drp1 knockdown fails to do so (Fig. 3E). On the  
336 other hand, both weak and strong Drp1 knockdown caused marked elevation of Sox2 in  
337 a graded fashion (Fig. 3E). The increase in Sox2 with Drp1 repression in the  
338 keratinocytes is consistent with findings in Drp1 ablated mouse embryonic fibroblasts  
339 (Parker et al., 2015) and neural stem cells (Iwata et al., 2020). Thus, unlike the stronger  
340 Drp1 knockdown, the weaker Drp1 knockdown maintains detectable Drp1 protein, and

341 uniquely sustains a Sox2-hi/Krt15-hi population characteristic of the naturally Drp1  
342 attenuated TF-1 population.

343 Cell cycle status is a crucial determinant of stemness (Orford & Scadden, 2008,  
344 Otsuki & Brand, 2018, Pauklin & Vallier, 2013). Sox2 expression is under the influence  
345 of various G1 cyclins (Liu, Michowski et al., 2019). Cyclin E, which is indispensable for  
346 S phase entry from quiescence and also for neoplastic transformation (Geng, Yu et al.,  
347 2003, Siu, Rosner et al., 2012), is critical for sustaining Sox2 expression (Liu et al.,  
348 2019). Interestingly, among the major cyclins, Cyclin E1 levels are particularly higher in  
349 the Sox2 enriched Drp1 attenuated TF-1 population, when compared to the Parental,  
350 while Cyclin D is particularly higher in the TF-10 population (corroborating sc-RNAseq  
351 data, Fig. 2D) (Fig. 3F). Moreover, Cyclin E1 is preferentially accumulated in the  
352 nucleus in the TF-1 population, which is required to impact gene expression of Sox2  
353 (and others) (Fig. 3G,H). Stringent regulation the Cyclin E protein levels involves its  
354 degradation triggered by phosphorylation by its cognate kinase CDK2 at the T62  
355 residue (Siu et al., 2012). Thus, level of pCyclinE(T-62) reflects the level of active Cyclin  
356 E that drives transcription and remains susceptible to degradation. Immunostaining  
357 based co-expression analyses showed that in the TF-1 population, elevated Sox2 is  
358 sustained in cells with lower level of pCyclinE(T-62) than in the Parental population that  
359 has overall lower levels of Sox2 (Fig. 3I). Moreover, cycloheximide chase assay, to  
360 assess degradation rate of proteins, revealed no Cyclin E degradation in TF-1 cells in  
361 comparison to marked CycE degradation in the Parental cells; both populations  
362 maintain Tom20 (mitochondrial marker) within the 2 hour assay time frame (Extended.  
363 Fig. 3C). Thus, our data is consistent with elevated Sox2 in the TF-1 population being  
364 sustained by elevated Cyclin E levels achieved by attenuation of its degradation  
365 kinetics. Given, mitochondrial regulation of Cyclin E regulates Cyclin E degradation  
366 (Mandal, Freije et al., 2010, Parker et al., 2015), we tested if repression of Drp1 driven  
367 mitochondrial fission in the Parental cells can elevate Cyclin E levels towards sustaining  
368 the observed elevated Sox2 levels. Indeed, Cyclin E is dramatically accumulated in the  
369 nucleus in a graded manner with Drp1 knockdown efficacy (Fig. 3J,K), similar to Sox2  
370 (Fig. 3E). Thus, our data shows that Drp1 repression elevates nuclear Cyclin E and  
371 Sox2 levels, which is characteristic of the naturally Drp1 attenuated TF-1 population.

372           Given, Sox2 and Cyclin E are important for neoplastic transformation in various  
373 cancer types (Hwang & Clurman, 2005, Schaefer & Lengerke, 2020, Teixeira & Reed,  
374 2017), and Krt15+ cells give rise to skin carcinoma (Li, Park et al., 2013, Seykora &  
375 Cotsarelis, 2011), we asked if repression of Drp1 can modulate the process of  
376 carcinogen driven neoplastic transformation of keratinocytes. Thus, we exposed control  
377 and Drp1 knockdown Parental keratinocytes to 1 and 10nM TCDD following standard  
378 TCDD driven transformation protocol. Interestingly, the weaker Drp1 knockdown, which  
379 maintains Krt15-hi/Sox2-hi status and elevated nuclear Cyclin E, got transformed by  
380 10nM TCDD even earlier than the control (Fig. 3L); 1 nM TCDD did not cause any  
381 transformation at this time point. This happened in spite of their lower proliferation rate  
382 than the control in the earlier time point. On the other hand, the stronger Drp1  
383 knockdown, which also maintained slower cell proliferation rate and a Krt15-lo/Sox2-hi  
384 status with elevated nuclear Cyclin E, is not transformed in the same time window (Fig.  
385 3L).

386           In summary, our data suggest that fine-tuned repression (ftr) of Drp1, sustained  
387 by incomplete knockdown of Drp1, allows enrichment of a [Drp1<sup>ftr</sup>-CyclinE<sup>hi</sup>-Sox2<sup>hi</sup>-  
388 Krt15<sup>hi</sup>] state that is particularly susceptible to neoplastic transformation by higher TCDD  
389 dose. This primed state is characteristic of the neoplastic stem/progenitor cell enriched  
390 [Drp1<sup>att</sup>-CyclinE<sup>hi</sup>-Sox2<sup>hi</sup>-Krt15<sup>hi</sup>] TF-1 population resulting with lower TCDD dose.  
391 Moreover, close to complete repression of Drp1 sustains a [Drp1<sup>lo</sup>-CyclinE<sup>hi</sup>-Sox2<sup>hi</sup>-  
392 Krt15<sup>lo</sup>] state, and does not support transformation as reported for Drp1 ablated MEFs  
393 (Serasinghe et al., 2015).

394

395 **Fine-tuned repression of Drp1 maintains smaller fused mitochondrial elements,**  
396 **and sustains transcriptomic profile similar to the neoplastic stem cell enriched**  
397 **TF-1 population**

398           Towards understanding the mechanism of fine-tuned (incomplete) Drp1  
399 repression driven priming of neoplastic transformation, we performed detailed  
400 comparison of mitochondrial shape and over all gene expression between the Parental  
401 keratinocytes expressing control, weak or strong Drp1 shRNAs. Quantification of  
402 mitochondrial fission and fusion metrics contributing to mitochondrial shape in live cells

403 confirmed that the stronger (more complete) Drp1 knockdown maintains ~77% of the  
404 cells in the hyperfused state i.e. [Fission] metric  $<0.2$  and [Fusion5] metric  $>80$   
405 (Spurlock et al., 2019), while the control population maintains ~55% of the cells in this  
406 state (Fig. 4A, blue box, Extended. Fig. 3D). On the other hand, the weaker  
407 (incomplete) Drp1 knockdown maintains only ~40% of the cells in the hyperfused state  
408 (Fig. 4A, blue box), while uniquely maintaining ~28% of the cells in the [Fission] range of  
409 0.2-0.4 and [Fusion5] range of 40-80 (Fig. 4A, red box). Closer examination of cells  
410 within this unique population in the weaker Drp1 knockdown population revealed distinct  
411 mitochondrial fragments along with extensive tubular mitochondria, as opposed to  
412 uniformly hyperfused mitochondria (Extended Fig. 3D). To understand this distribution  
413 better, we probed the relationship of mitochondrial fission and fusion metrics with the  
414 mitochondrial number and length metrics that they are derived from. The cells with the  
415 unique mitochondrial fission/fusion state (Fission: 0.2-0.4 and Fusion5: 40-80) have  
416 lower mitochondrial number and total mitochondrial length (Fig. 4B), signifying decrease  
417 in mitochondrial content in this subpopulation. However, cells with hyperfused  
418 mitochondria (Fission $<0.2$ ; Fusion5 $>80$ ) have distinctly higher mitochondrial number in  
419 the weaker Drp1 knockdown population but have comparable mitochondrial length to  
420 those in the stronger Drp1 knockdown population (Fig. 4B). To confirm that such an  
421 increase in mitochondrial number in the weaker Drp1 knockdown with hyperfused  
422 mitochondria is due to a greater number of smaller mitochondrial hyperfused networks,  
423 we quantified the percent length of the longest mitochondrial elements (Fusion1).  
424 Indeed, less than 7% of cells have  $>80\%$  of the mitochondrial length as hyperfused in  
425 the weaker Drp1 knockdown, compared to ~40% in the stronger Drp1 knockdown (Fig.  
426 4C, top). More importantly, the enriched population of cells in the weaker Drp1  
427 knockdown with fission range of 0.2-0.4 have only up to 40% of the mitochondrial  
428 lengths in fused networks (Fig. 4C, bottom). We detected cells with similar  
429 mitochondrial fission and fusion features particularly in (FACS sorted) mitochondria  
430 primed ovarian neoplastic stem cell population that has 10-fold higher ability of self-  
431 renewal and proliferation (Spurlock et al., 2021b). Therefore, these data demonstrate  
432 that the fine-tuned Drp1 repression, which primes cells for transformation, enriches a  
433 subpopulation of cells maintaining more number of smaller fused mitochondrial

434 elements, distinct mitochondrial puncta and minimal mitochondrial content (Extended  
435 Fig. 3D). We conclude that the remnant Drp1 driven mitochondrial fission in the weaker  
436 Drp1 knockdown population prevents the net fusion of the smaller fused elements to  
437 form a larger hyperfused mitochondrial network, and may also underlie generation of  
438 the mitochondrial puncta. We speculate that the functional significance of such  
439 previously unappreciated distinctions in mitochondrial shape may involve Drp1 driven  
440 regulation of mitophagy (Twig & Shirihai, 2011).

441 To probe the contribution of gene expression of any particular cell population in  
442 neoplastic transformation after Drp1 repression, we performed sc-RNAseq of the control  
443 and Drp1 knockdown Parental populations. First, we compared the overall gene  
444 expression within the gene coverage in our scRNA-seq data set. Indeed, the weaker  
445 Drp1 knockdown, which maintains higher Drp1 transcript levels, modulates a smaller  
446 gene set to a smaller degree compared to the stronger Drp1 knockdown that maintains  
447 lower Drp1 transcript levels (Extended. Fig. 4A, B). However, graded Drp1 knockdown  
448 has both ‘similar’ (graded upregulation or downregulation) and ‘opposite’ effects  
449 (upregulation in one and downregulation in the other) (Extended Fig. 4C). The opposite  
450 effect is dominated by Krt15, Krt13, Krt4, Krt5 transcripts being upregulated in the  
451 weaker Drp1 knockdown and downregulated in the stronger Drp1 knockdown (color  
452 coded \* in Fig. 4D, Extended Fig. 4C), corroborating our findings on Krt15 protein levels  
453 (Fig. 3E). On the other hand, genes for various mitochondrial proteins, involved in  
454 mitochondrial energetics, redox or biogenesis, were upregulated particularly in the  
455 stronger Drp1 knockdown (Fig. 4E upper panel, Extended Fig. 4C, bold). This is  
456 consistent with our observation of decreased mitochondrial content in the weaker Drp1  
457 knockdown (Fig. 4B). Synthesis of the mitochondrial proteins can be potentially  
458 sustained by elevated ribosomal genes and genes involved in protein synthesis in the  
459 stronger Drp1 knockdown (Fig. 4E, lower panel). Although Drp1 repression has been  
460 linked with regulation of ribosomal genes and protein synthesis (Tanwar et al.,  
461 2016)(Zhao Q et al., 2021)(Favaro, Romanello et al., 2019), this area warrants further  
462 focused investigation.

463 Next, we performed cell clustering in a UMAP plot and obtained 6 clusters  
464 (Extended. Fig. 4D, Extended Data Table 3). Based on the remarkable correspondence

465 of the top conserved cluster markers identified in the Parental/transformed data set  
466 (Fig.2), we assigned cluster identities of G2-M, S-early, S-late, mtDNA-lo, SloCycl-  
467 Krt15-hi and Cytokine to the control and Drp1 knockdown data set (Extended. Fig. 4D).  
468 The number of common cluster markers show overall 40-80% correspondence between  
469 the two data sets, with some exceptions in the S-late and mtDNA-lo clusters (Extended.  
470 Fig. 4E). Strikingly, the weaker Drp1-knockdown population exhibits expansion of the  
471 SloCycl-Krt15-hi cluster and reduction of the Cytokine and mtDNA-lo clusters observed  
472 in the [Drp1<sup>att</sup>-CyclinE<sup>hi</sup>-Sox2<sup>hi</sup>-Krt15<sup>hi</sup>] TF-1 population, albeit to a lesser degree (Fig.  
473 4F). This similarity in cluster organization suggests that the non-transformed Parental  
474 population with fine-tuned Drp1 repression establishes a gene expression profile to  
475 poise the cells for neoplastic transformation, and thus explains their accelerated  
476 neoplastic transformation ability only with higher TCCD dose (Fig. 3L). On the other  
477 hand, the stronger Drp1 knockdown markedly reduced the abundance of the SloCycl-  
478 Krt15-hi cluster and exhibits overall opposite trend of cluster profile compared to the  
479 weaker Drp1 knockdown and TF-1 population (Fig. 4F). Krt15 and various other marker  
480 Keratin genes are dramatically suppressed across the clusters in the stronger Drp1  
481 knockdown and while they are over all elevated in the weaker Drp1 knockdown  
482 (Extended Fig. 4F). This data, suggesting that impact of the level of Drp1 repression on  
483 specific keratin transcripts is direct and not due to cluster organization, confirms and  
484 expands our findings on Krt15 protein levels (Fig. 3E). Moreover, analyses of cell cycle  
485 distribution (as in Fig. 2) revealed higher G2-M score and less S score in the stronger  
486 Drp1 knockdown, while weaker Drp1 knockdown has similar cell cycle distribution to the  
487 control (Fig. 4G). The stronger Drp1 knockdown maintains more cells in G2-M and less  
488 cells in S particularly in the SloCycl-Krt15-hi as well as the mt-DNA-lo cluster (Extended.  
489 Fig. 4H), contradictory to their reciprocal nature in the TF-1 population (Fig. 2). The  
490 dramatic reduction of the SloCycl-Krt15-hi cluster in the stronger Drp1 knockdown cells  
491 could be due to their inability of exiting the elevated CyclinB1/CDK1 driven G2-M  
492 regulation in this cluster (Fig. 4H, left). Also, the stronger Drp1 knockdown maintained  
493 marked elevation of the growth factor cyclin, Cyclin D2 and reduction of the S phase  
494 marker, PCNA, across clusters (Fig. 4H, right); Cyclin E1 and Sox2 transcripts were not  
495 detected in this data set. Therefore, our data shows that fine-tuned repression of Drp1,



496 which accelerates carcinogen induced cell transformation, maintains a gene expression  
497 profile characteristic of the [Drp1<sup>att</sup>-CyclinE<sup>hi</sup>-Sox2<sup>hi</sup>-Krt15<sup>hi</sup>] TF-1 population. The  
498 stronger Drp1 knockdown fails to do so, has cell cycle disturbances and dramatically  
499 reduced expression of relevant keratin genes. We speculate that repression of Drp1  
500 beyond an optimal level may initiate compensatory changes through the retrograde  
501 pathway to trigger mitochondrial biogenesis and suppress relevant keratin genes (Ryan  
502 & Hoogenraad, 2007).

503 Taken together, our detailed molecular analyses of the *in vitro* keratinocyte  
504 model suggest that a “goldilocks” level of fine-tuned repression of Drp1 accelerates  
505 neoplastic transformation by priming a distinct stem/progenitor-like state (Fig. 5). We  
506 propose that the priming is brought about by flexibility of Drp1 regulation that sustains  
507 distinct mitochondrial and gene expression characteristics leading to the enrichment of  
508 a slow cycling [Drp1<sup>fr</sup>-CyclinE<sup>hi</sup>-Sox2<sup>hi</sup>-Krt15<sup>hi</sup>] stem/progenitor-like state. Cyclin E,  
509 which maintains expression of stem cell markers, is indispensable for exiting cell cycle  
510 quiescence and also for neoplastic transformation (Hwang & Clurman, 2005, Schaefer  
511 & Lengerke, 2020, Teixeira & Reed, 2017) (Liu et al., 2019). We speculate that the slow  
512 cycling [Drp1<sup>fr</sup>-CyclinE<sup>hi</sup>-Sox2<sup>hi</sup>-Krt15<sup>hi</sup>] stem/progenitor-like state has reduced depth of  
513 cell cycle quiescence (van Velthoven & Rando, 2019) towards rapidly transitioning to a  
514 self-renewing/proliferation state to support neoplastic transformation. Such transition  
515 may involve further activation of mitochondrial fission induced by signaling pathways  
516 supporting stemness, which would be prevented with supra-optimal Drp1 knockdown  
517 (as shown here) or total ablation of Drp1 (as reported) (Kashatus, Nascimento et al.,  
518 2015, Serasinghe et al., 2015, Spurlock et al., 2019). This conceptualization helps  
519 explain how regulated reduction and increase of Drp1 activity can potentially maintain  
520 adult stem cell properties (Iwata et al., 2020, Khacho & Slack, 2017, Parker et al., 2015,  
521 Xie et al., 2015). Furthermore, our data raises the possibility that the [Drp1<sup>att</sup>-CyclinE<sup>hi</sup>-  
522 Sox2<sup>hi</sup>-Krt15<sup>hi</sup>] TF-1 population represents an early stage of neoplastic transformation  
523 when stem cells self-renew to form less differentiated tumors, unlike the differentiated  
524 tumors formed by the [Drp1<sup>hi</sup>-CyclinE<sup>lo</sup>-Sox2<sup>lo</sup>-Krt15<sup>hi</sup>] TF-10 population. Further *in vivo*  
525 validation of our findings would reveal if and how bodily stresses causing mild  
526 repression of Drp1 driven mitochondrial fission, can possibly enrich the mitochondria

527 primed stem/progenitor-like population in tissues making them susceptible to neoplastic  
528 transformation. Enhanced mitochondrial fusion, proposed as a required event of  
529 neoplastic transformation of stem cells (Bonney et al., 2020), may also involve such  
530 mitochondria driven priming.

531

## 532 **MATERIALS AND METHODS**

### 533 **Materials**

534 Biochemicals were obtained from Fisher Biochemicals or Sigma. Other materials: Drp1  
535 shRNA (Dharmacon); Fluoromount G (SouthernBiotech); FuGENE<sup>®</sup> 6 Transfection  
536 Reagent (Promega); Luminata Forte Western HRP substrate (Millipore); 4%  
537 paraformaldehyde aqueous solution and Triton X-100 (FisherScientific); Labtek  
538 chambers (Nalgen Nunc International); DMEM (GIBCO); Geltrex (GIBCO); Primary  
539 antibodies were against: Drp1 (western blotting, 1:1000; immunofluorescence, 1:100;  
540 BD Biosciences); Cyclin E1 (HE12) (western blotting, 1:1000; immunofluorescence  
541 1:100; Cell Signaling); actin AB-5 (1:10000; BD Biosciences), Sox2 (western blotting,  
542 1:500; immunofluorescence, 1:100; BD Bioscience), HSP-60 (1:200; BD Bioscience);  
543 Cytokeratin 15 (western blotting, 1:2000; immunofluorescence, 1:200; Abcam); Oct4  
544 (immunofluorescence, 1:50; Cell Signaling); Nanog (immunofluorescence, 1:50; Cell  
545 Signaling). Secondary antibodies were from Jackson ImmunoResearch Laboratories.  
546 Athymic nude mice were purchased from Jackson laboratories.

### 547 **Cell culture methods**

548 HaCaT cells were cultured on plastic dishes in Dulbecco's Modified Eagle's Medium  
549 (DMEM) with high glucose (4.5 g/L), sodium pyruvate (1 mM), L-Glutamine (4 mM),  
550 Penicillin (100 U/mL), Streptomycin (100 µg/mL), and 10% FBS using standard  
551 techniques. Transformed keratinocytes were derived from the Parental HaCaTs by  
552 selecting multiple clones after treatment with the noted dose of TCDD with  
553 replenishment with fresh TCDD every 2-3 days. The derived lines were treated with two  
554 courses of BM-Cyclin treatment to eliminate any mycoplasma infection.

555 Transfections were performed using Fugene 6 Transfection Reagent modifying  
556 manufacturer's protocols. Lines stably expressing Drp1-shRNAs or PSmO were  
557 selected using puromycin treatment (2 µg/mL) with regular media changes for 2 weeks  
558 until resistant colonies grew. The stable Drp1 knockdown lines were treated with two  
559 courses of BM-Cyclin treatment to eliminate any mycoplasma infection.

560 Standard cell proliferation assay was performed as described in (Parker et al.,  
561 2015). The extreme limiting dilution analysis (ELDA) of spheroid formation ability was  
562 performed by seeding 1, 10, 100, and 1000 cells per well with 24 wells per dose in a 96  
563 well UltraLow Attachment plate and TIC-supporting media (DMEM:F12 supplemented  
564 with human growth factors as published elsewhere (Spurlock et al., 2019)). Wells were  
565 extended with media equaling 10% of the total volume every second day. On  
566 Day 5, the total number of wells for each dose containing nascent spheroids was  
567 tabulated. The online ELDA tool was used to analyze the results (Hu & Smyth, 2009).

#### 568 **Immunoblotting and Immunofluorescence**

569 Immunoblotting was performed using standard techniques. Whole cell lysates were run  
570 on 10% polyacrylamide gels and transferred to PVDF membranes followed by probing  
571 with appropriate primary and secondary antibodies.

572 Immunofluorescence was performed as described previously (Parker et al., 2015)  
573 on cells seeded in LabTek 8-well glass bottom or slide chambers. Briefly, cells were  
574 fixed in freshly prepared 4% aqueous paraformaldehyde supplemented with 4 %w/v  
575 sucrose and permeabilized in freshly prepared 0.1 % Triton X-100 prior to staining.  
576 Immunostained cells were mounted in Fluoromount with DNA stain Hoechst 33342 (10  
577 µg/mL).

#### 578 **Confocal microscopy, image processing and analysis**

579 Confocal microscopy was performed on a Zeiss LSM700 microscope equipped with 405  
580 nm, 488 nm, 555 nm, and 639 nm lasers, using the proprietary Zen Black (2012)  
581 software. Confocal micrographs were acquired with optimized laser powers and  
582 appropriate filters to minimize crosstalk, cross-excitation and bleaching. Live cells were  
583 imaged using a temperature and CO<sub>2</sub> controlled chamber set to 37 C and 5% CO<sub>2</sub>.

584 Image processing and analysis of relative protein abundance and localization  
585 were performed using Zen Black and Zen Blue software to obtain background corrected  
586 mean fluorescence intensities within defined regions of interest drawn on maximum  
587 intensity z-projections of optical slices. Nuclear and cytosolic regions were demarcated  
588 based on DNA stain Hoechst 33342 and the immunostain of the molecule of interest,  
589 respectively. The [Fission] and [Fusion1/5] metrics using MitoGraph v2.1 software run  
590 on 3D stacks of confocal optical slices acquired from live cells expressing mito-PSmO  
591 or stained with Mitotracker Green, as described in (Spurlock et al., 2019). [Fission] is  
592 total mitochondria number / total mitochondrial length; [Fusion5] is (sum of top 5  
593 mitochondrial length / total mitochondrial length) X 100. Microsoft Excel and IBM SPSS  
594 Statistics 23 were used to perform background corrections, bivariate analyses and  
595 significance testing.

#### 596 **Tumor Forming Assay in mice and histochemistry**

597 5 million transformed HaCaT cells were injected in subcutaneously in the flank of  
598 athymic nude mice to form xenograft tumors. Prior to injection, cells were trypsinized  
599 and washed once with sterile PBS, and finally resuspended to 25,000 cells/ $\mu$ L in room  
600 temperature PBS with Geltrex. Tumors arising within 6 to 8 months were harvested for  
601 histochemical analyses. The harvested tumors were frozen unfixed in TissueTek OCT  
602 compound on dry-ice. A Cryostat was used to obtain 5  $\mu$ m slices, which were then fixed  
603 using freshly made cold 4% paraformaldehyde and then stained with H&E using  
604 standard techniques.

#### 605 **Single Cell RNAseq and data analyses**

606 Trypsinized single cells were washed in PBS (without  $Ca^{++}$  or  $Mg^{++}$ ) with 0.04% BSA  
607 and tested for >90% viability. Single cell analysis was performed on a 10xGenomics  
608 platform according to 3' v3.1 NextGem Dual Index manual. The 3'-biased cDNA libraries  
609 were constructed through the following steps: cDNA fragmentation, end repair & A-  
610 tailing, and size selection by SPRIselect beads, adaptor ligation, and sample index PCR  
611 amplification, and then SPRIselect beads size selection again. The final constructed 3'-  
612 biased single cell libraries were sequenced by Illumina Nextseq500 machine, targeting

613 total reads per cell for 20,000 at minimum, and the sequencing cycles consisted of 28bp  
614 for read 1, 90 bp for read 2, and 10 bp for i7 index, and 10bp for i5 index.

615 Count matrices were generated from the single-cell raw fastq files using 10x  
616 genomics *cellranger* software (v.4.0) using hg38 reference genome provided by 10x  
617 Genomics. We filtered the data to only include cells expressing at least 2000 detectable  
618 genes (using “nFeature\_RNA” filter); this also filtered out dead cells with >10% mt-DNA  
619 gene expression in our data set. Our data coverage included approximately ~ 3000  
620 genes in average of 5000 cells in each population. The resulting count matrices were  
621 analyzed by Seurat package (v3.9.9) with the standard workflow (Butler *et al*, 2018;  
622 Stuart *et al*, 2019). After applying the (*nFeature\_RNA* > 2000), the expression data were  
623 then normalized using the *NormalizeData* function in Seurat and variable featuresets  
624 were identified using the *FindVariableFeatures* function in Seurat. Depending on the  
625 type of comparison, specific sets of samples were combined using the *IntegrateData*  
626 function. The integrated datasets were scaled and cells were clustered with up to 20  
627 dimensions (dim=1:20). We performed clustering using several resolution parameters  
628 (0.1-0.8) and visually selected optimal resolution for specific datasets. The clusters were  
629 visualized using UMAP with up to 20 dimensions. Marker genes for each cluster were  
630 calculated with the *FindAllMarkers* function and statistical significance was calculated by  
631 Wilcoxon Rank Sum test. Differential expression of the cluster markers was carried out  
632 using the *FindMarkers* function of Seurat. For this, we only used the normalized data  
633 before integration (assay ‘RNA’) using the Wilcoxon rank sum test, as suggested by  
634 Seurat documentation. For cell-cycle scoring, we use the *CellCycleScoring* function of  
635 Seurat, which provides scores of G2M and S phase scores and assigns cell-cycle  
636 phases based on these scores (Tirosh *et al*, 2016). The cell-lineage determination and  
637 trajectory calculation were carried out using the *Slingshot* (Street *et al*, 2018) package  
638 with Seurat clusters and default parameters. The algorithm was allowed to automatically  
639 identify the start and the end clusters. GSEA analyses were performed with ranked log  
640 fold change (LFC) of markers (>0.1, p<0.01) using MsigDB as described in (Tanwar *et*  
641 *al.*, 2016). Overrepresentation analyses were performed with genes with negative LFC  
642 in Cluster 5 using the Reactome PA package of R v 3.6.0.

643

644 **Statistical analyses:**

645 Drawing of plots and statistical analyses were performed using Excel, SPSS or R  
646 package as mentioned in appropriate section above.

647

648 **ACKNOWLEDGEMENTS:**

649 BS, KM, AM are supported by NIH award (# R33ES025662). We acknowledge Dezhi  
650 Wang from the Pat Pathology Core Research Laboratory for preparation of H&E stained  
651 slides, the UAB Flow Cytometry and Single Cell Services Core that is supported by  
652 AR048311, AI027667, and the Dr. Mike Crowley from the Heflin Genomics Core for sc-  
653 RNAseq.

654 **AUTHOR CONTRIBUTION**

655 BS designed and performed experiments and analyzed data along with AM and AG; DP  
656 generated the transformed lines and performed basic characterization; ABH supervised  
657 the xenograft experiments performed by BS and SG; GPS performed the pathological  
658 evaluation of tumor sections; SL provided consultation for the sc-RNAseq and prepared  
659 the scRNAseq library; MKB provided consultation for the sc-RNAseq analyses and  
660 performed the analyses; KM conceived the study, helped in experimental design,  
661 analyzed data and wrote the manuscript with BS.

662 **DECLARATION OF INTEREST**

663 The authors declare no competing interests.

664

665

666

667

668

669

670 **FIGURE LEGENDS:**

671 **Figure 1. Keratinocytes transformed under mild carcinogenic stress exhibit**  
672 **attenuated Drp1 activity and have abundant self-renewing/proliferating cells.**

673 **A)** Cell proliferation assay (quantified by crystal violet staining) of HaCaT cells after  
674 exposure to TCDD (1 or 10 nM) over 4 and 16 days, with Toluene (10nM) as vehicle  
675 control. **B)** Immunoblot analyses of AHR and actin (loading control) in transformed  
676 HaCaT populations, TF-1 and TF-10, in the absence of TCDD. **C)** Representative  
677 micrographs (40X) of H&E stained sections of tumor xenografts formed by TF-1 and TF-  
678 10 HaCaT cells; zoom of boxed region shown in the bottom panels. **D)** Immunoblot  
679 analyses of Drp1, pDrp1(S616), Mfn1, Mfn2, Opa1 and actin (loading control) in TF-1  
680 and TF-10 HaCaT cells. **E)** Maximum intensity projection of confocal optical sections of  
681 representative Parental, TF-1 and TF-10 HaCaT cells expressing mitoPSmO. **F)**  
682 Quantification of mitochondrial [Fission] and [Fusion5] metrics from micrographs  
683 represented in (E). **G)** Quantification of cell proliferation assay (as in A) of Parental, TF-  
684 1 and TF-10 HaCaT cells over 7 days in the absence of TCDD. **H)** Representative  
685 micrograph showing spheroids formed when  $10^4$  Parental, TF-1 or TF-10 HaCaT cells  
686 were maintained in low attachment plate in presence of stem cell medium. **I)**  
687 Quantification of spheroid forming frequency of Parental, TF-1 or TF-10 HaCaT cells  
688 using ELDA. \* signifies p value of <0.05 in T test (A,F) and ELDA (I); scale bar depicts  
689 10  $\mu$ m (D) and 100  $\mu$ m (H).

690

691 **Figure. 2. Drp1 attenuated TF-1 keratinocyte population maintains an expanded**  
692 **slow-cycling subpopulation with elevated stem/progenitor cell markers. A)** UMAP  
693 plot of scRNA-seq derived clusters (0-5) of Parental, TF-1 and TF-10 HaCaT cells (top);  
694 pie chart of the percentage distribution of the clusters (bottom, p value from ChiSquare  
695 test); color coded arrows point the clusters with unique reciprocal abundance in TF-1  
696 cells. **B)** Violin plots depicting expression of Krt13, Krt15, Krt5, Sox2 and Sox4 in the  
697 clusters identified in (A) in the Parental, TF-1 and TF-10 HaCaT cells; color coded arrow  
698 point to Cluster 3 marked by Krts. **C)** Normalized Enrichment Scores (NES) of functional  
699 pathways identified by GSEA analyses of marker genes of Clusters 0-4 (Extended data  
700 Table 2) and by overrepresentation analyses for Cluster 5 (\* represents categories

701 including mtDNA genes); functional categories defined by majority of the leading-edge  
702 genes are in parentheses, while clusters are arranged based on trajectory analyses  
703 (open arrows) (see Extended Fig. 2F). **D**) Violin plots depicting expression of cyclinA2,  
704 cyclinB1, CDK1, cyclinD2 and PCNA in the clusters identified in (A) in the Parental, TF-  
705 1 and TF-10 HaCaT cells; the functional category of genes identified in (C) is included in  
706 the cluster identity. **E**) Distribution of G2-M and S scores obtained by gene expression  
707 analyses of cell cycle predictive genes in the Parental, TF-1 and TF-10 HaCaT cells. **F**)  
708 Feature plot of G2-M and S scores obtained from (E). **G**) Bar plot showing fraction of  
709 cells in G2-M, S and G0/G1, computed from (E) in the functionally categorized clusters  
710 in the Parental, TF-1 and TF-10 HaCaT cells; inset shows G1 to S reciprocity of the  
711 clusters (color-coded arrows) with unique reciprocal abundance in TF-1 cells in (A).

712

713 **Figure 3. Fine-tuned repression of Drp1 sustains a [CyclinE<sup>hi</sup>-Sox2<sup>hi</sup>-Krt15<sup>hi</sup>] state**  
714 **and accelerates carcinogen driven cell transformation. A)** Immunoblot analyses of  
715 Sox2, Krt15 and actin (loading control) in Parental and TF-1 and TF-10 HaCaT cells. **B**)  
716 Dot plot of [Sox2] and [Krt15] levels obtained from confocal micrographs of co-  
717 immunostained Parental and TF-1 HaCaT cells; black lines, marking 4 quadrants,  
718 represent levels of Sox2 and Krt15 determined from normalized signal in each  
719 population (see Extended Fig. 3B). **C**) Dot plot of [Sox2] and [Drp1] levels obtained from  
720 confocal micrographs of co-immunostained Parental and TF-1 HaCaT cells; dotted lines  
721 mark the levels of [Drp1] in cells expressing higher [Sox2] levels. **D**) Dot plot of [Sox2]  
722 and [pDrp1(S616)] levels obtained from confocal micrographs of co-immunostained  
723 Parental and TF-1 HaCaT cells; dotted lines mark the levels of [pDrp1(S616)] in cells  
724 expressing higher [Sox2] levels. **E**) Immunoblot analyses of Drp1, Krt15, Sox2 and actin  
725 (loading control) in Parental HaCaT cells expressing non-targeted shRNA (Cnt), weaker  
726 (W) or stronger (S) Drp1 shRNA. **F**) Immunoblot analyses of Cyclins E1, E2, A2, B1, D2  
727 and actin (loading control) in Parental and stable TF-1 and TF-10 HaCaT cells. **G**)  
728 Representative confocal micrographs of Cyclin E1 immunostaining in Parental and TF-1  
729 HaCaT cells; N depict the nucleus in each cell identified by DNA stain (not shown). **H**)  
730 Box plot showing quantification of nuclear to cytosolic ratio of Cyclin E1 levels quantified  
731 from experiment described in (G). **I**) Dot plot of [Sox2] and [CyclinE1(pT62)] levels



732 obtained from confocal micrographs of co-immunostained Parental and TF-1 HaCaT  
733 cells; dotted lines mark the levels of [CyclinE1(pT62)] in cells expressing higher [Sox2]  
734 levels. **J)** Representative images of Cyclin E1 immunostaining in Parental HaCat cells  
735 expressing non-targeted shRNA (Cnt), weaker (W) or stronger (S) Drp1 shRNA. **K)** Box  
736 plot showing quantification of nuclear to cytosolic ratio of Cyclin E1 levels quantified  
737 from experiment described in (J). **L)** Cell proliferation assay of Parental HaCaT cells  
738 expressing non-targeted shRNA (Cnt), weaker (W) or stronger (S) Drp1 shRNA after  
739 exposure to TCDD (1nM or 10nM) at an early and a late time point in the neoplastic  
740 transformation protocol; 'Toluene' is the vehicle control for TCDD and 'Control' is with  
741 no chemical. \* signifies p value of <0.05 in KW (G) and T test (L); scale bar depicts 20  
742  $\mu\text{m}$ .

743

744 **Figure 4. Fine-tuned repression of Drp1 maintains smaller fused mitochondrial**  
745 **elements, and sustains transcriptomic profile similar to the neoplastic stem cell**  
746 **enriched TF-1 population. A)** Dot plot of [Fission] and [Fusion5] obtained from  
747 confocal micrographs of Mitotracker green stained live Parental HaCaT cells expressing  
748 non-targeted shRNA as control (Cnt), weaker (W) or stronger (S) Drp1 shRNA; numbers  
749 denote the percentage of cells in the adjacent boxes with p value from ChiSquare test;  
750 representative images in Extended Fig. 3D **B)** Dot plot of [Fission] or [Fusion5] of single  
751 cells (from A) with their total mitochondrial number and total mitochondrial length; lines  
752 represent the ranges of [Fission] and [Fusion5] to demarcate cell subpopulations in  
753 boxes in (A). **C)** Bar graph signifying percentage of cells from (A) with >80 [Fusion1]  
754 metric (top); dot plot of [Fission] and [Fusion1] of cells from (A) (bottom). **D)** Barplots  
755 showing positive and negative log fold change values of top 20 genes in Parental  
756 HaCaT cells expressing weaker (W) (Top) or stronger (S) (bottom) shRNA with respect  
757 to the cells expressing non-targeting shRNA (Cnt); 0 signifies no change and color  
758 coded \* denote relevant Krt genes. **E)** Barplot showing ratio of absolute expression  
759 values of mitochondrial genes (top) and ribosomal or protein translation genes (bottom)  
760 in the Parental HaCat cells expressing the stronger (S) or the weaker (W) Drp1 shRNA  
761 with respect to those expressing non-targeting shRNA (Cnt); 1 signifies no change. **F)**  
762 Line plot showing % population of Parental cells expressing the strong (S) or weak (W)

763 Drp1 shRNA in the named scRNA-seq derived cell clusters, with respect to those  
764 expressing non-targeting shRNA (Cnt). This is compared to the same in the TF-1 cells  
765 with respect to its Parental population; 1 signifies no change from respective control. **G)**  
766 Distribution of G2-M and S scores obtained by gene expression analyses of cell cycle  
767 predictive genes in the Parental HaCaT cells expressing non-targeted shRNA (Cnt),  
768 weaker Drp1-shRNA (W) or stronger shRNA (S). **H)** Violin plots depicting expression of  
769 cyclinB1, CDK1 (left panel) and cyclinD2, PCNA (right panel) in the named scRNA-seq  
770 derived cell clusters in the Parental HaCaT cells expressing non-targeted shRNA (Cnt),  
771 weaker Drp1-shRNA (W) or stronger shRNA (S).

772

773 **Figure. 5. Proposed model of a ‘Goldilocks’ zone of Drp1 activity for priming a**  
774 **stem/progenitor like state to accelerate neoplastic transformation.** In a  
775 keratinocyte model, a level of fine-tuned repression (ftr) of Drp1 maintains smaller fused  
776 mitochondrial networks and sustains a state of [Drp1<sup>ftr</sup>-CyclinE<sup>hi</sup>-Sox2<sup>hi</sup>-Krt15<sup>+</sup>], which is  
777 susceptible to carcinogen (TCDD) driven neoplastic transformation. Low dose of TCDD  
778 driven transformation leads to a similar Drp1 attenuated (att) state of [Drp1<sup>att</sup>-CyclinE<sup>hi</sup>-  
779 Sox2<sup>hi</sup>-Krt15<sup>+</sup>] that forms less differentiated (primitive) tumors, while a 10-fold higher  
780 TCDD dose transforms cells to a state of [Drp1<sup>hi</sup>-CyclinE<sup>lo</sup>-Sox2<sup>lo</sup>-Krt15<sup>+</sup>] that forms  
781 differentiated tumors. Supra optimal repression of Drp1 maintains hyperfused  
782 mitochondria and sustains a state of [Drp1<sup>lo</sup>-CyclinE<sup>hi</sup>-Sox2<sup>hi</sup>-Krt15<sup>-</sup>], which prevents  
783 carcinogen driven neoplastic transformation.

784

785

786

787

788

789

790

791

792

793

794

795 **EXTENDED FIGURE LEGENDS:**

796 **Extended Figure 1. A)** Quantification of incidence and volume of xenograft tumors  
797 formed by TF-1 and TF-10 HaCaT cells; # indicates presence of a distant tumor. **B)**  
798 Immunoblot analyses of Cytochrome C, Fis1, Tom20 and actin (loading control) in  
799 Parental and TF-1 and TF-10 HaCaT cells.

800 **Extended Figure 2. A)** Bar plot showing the percentage distribution of the clusters (0-5)  
801 in each of the cell populations identified by scRNA-seq analyses of Parental, TF-1 and  
802 TF-10 HaCaT cells (left); numbers show cell cycle distribution from flowcytometry  
803 analyses of PI stained cells in the corresponding population (right). **B)** UMAP plot of  
804 scRNA-seq derived clusters (0-5) of Parental, TF-1 and TF-10 HaCaT cells obtained  
805 with minimum cluster resolution; color coded arrows point the major change in cluster  
806 distribution in transformed cells. **C)** Heat map of statistically significant marker genes for  
807 the color-coded clusters (0-5) of Parental, TF-1 and TF-10 HaCaT cells; color coded  
808 arrows point to the top most marker gene in the 3 clusters that are have different  
809 distribution between the Parental and transformed populations; color index shows log  
810 fold change; \* marks the Histone gene cluster. **D)** Violin plots depicting expression of  
811 the mt-DNA genes in the named scRNA-seq derived cell clusters in the Parental, TF-1  
812 and TF-10 HaCaT cells. **E)** Violin plots depicting expression of HES1 and OASL genes  
813 in the named scRNA-seq derived cell clusters in the Parental, TF-1 and TF-10 HaCaT  
814 cells. **F)** PCA plot of trajectory analyses of the scRNA-seq derived cell clusters in the  
815 Parental, TF-1 and TF-10 HaCaT cells.

816 **Extended Figure 3. A)** Representative confocal micrographs of immunostained  
817 Parental and TF-1 HaCaT cells showing endogenous expression of Oct4, Nanog and  
818 Sox2; blue depicting nuclear staining with Hoechst. **B)** Dot plot of [Sox2] and [Krt15]  
819 obtained from confocal micrographs of co-immunostained Parental and TF-1 HaCaT  
820 cells; [Sox2] levels normalized to the minimum in the respective population (left) and  
821 [Krt15] levels normalized to the minimum in the respective population (right); black lines  
822 demarcate levels of Sox2 and Krt15 as determined from the normalized signal of the  
823 other. **C)** Representative confocal micrographs of Parental and TF-1 HaCaT cells  
824 showing endogenous expression of Tom20 and Cyclin E1 after 2 hours incubation with

825 DMSO or Cycloheximide, with the pre-incubation time point (0h) as control. **D)**  
826 Representative maximum intensity projections (MIP) of confocal optical sections  
827 (micrograph) and the corresponding MitoGraph generated binary images (binary) for  
828 quantifying [Fission] and [Fusion1/5] metrics of the Parental HaCaT cells expressing  
829 non-targeted shRNA (Cnt), strong (S) or weak (W) Drp1 shRNA; the cells represent  
830 populations in colored boxes in Fig. 4A while the number depicts their abundance in  
831 percentage. Scale bar depicts 100  $\mu\text{m}$  (A, C) or 15  $\mu\text{m}$  (D).

832 **Extended Figure 4. A)** Bar plot showing the knockdown efficiency of strong (S) or weak  
833 (W) Drp1 shRNA expressed as ratio of Drp1 transcript levels in the knockdown HaCaT  
834 and that of the cells expressing the non-targeted shRNA control. **B)** Bar plot showing  
835 log fold change of overall gene expression of Parental HaCaT cells expressing strong  
836 (S) or weak (W) Drp1 shRNA with respect to those expressing the non-targeted shRNA  
837 (Cnt). **C)** Plots showing ratio of the expression of covered genes between the Parental  
838 HaCaT cells expressing strong (S) or weak (W) Drp1 shRNA; “Similar effects” showing  
839 ratio of increase or decrease in the (S) Drp1 shRNA over the (W) Drp1 shRNA (back  
840 arrows in left panel), while opposite effects showing opposite trends in genes as  
841 labelled in the arrows (back arrows right panel); grey arrows point to the top 20 genes of  
842 each category. **D)** UMAP plot of scRNA-seq based clusters (0-5) of Parental HaCaT  
843 cells expressing non-targeted shRNA (Cnt), strong (S) or weak (W) Drp1 shRNA; arrow  
844 pointing the SloCyc-Krt15-hi cluster (note color coding is not same as the one presented  
845 in Fig. 2). **E)** Bar plot showing percentage of statistically significant common genes  
846 (Upregulated or Downregulated) between color coded clusters obtained with the  
847 scRNA-seq data set of parental and transformed HaCaT cells (Fig. 2) and that of  
848 parental expressing control or Drp1 shRNAs (Fig. 4); same color coding is maintained  
849 between the two data sets. **F)** Violin plots depicting expression of Krt13, Krt15, Krt4,  
850 Krt5, Krt6A, Krt7 genes in the named scRNA-seq based cell clusters in the Parental  
851 HaCaT cells expressing non-targeted shRNA (Cnt), strong (S) or weak (W) Drp1  
852 shRNA. **G)** Bar plot showing fraction of cells in G2-M, S and G0/G1, computed from  
853 main Fig. 4G, in the functionally categorized clusters in the Parental cells expressing  
854 non-targeted shRNA (Cnt), strong (S) or weak (W) Drp1 shRNA.

855

856 **REFERENCES**

857  
858 Boelsma E, Verhoeven MC, Ponc M (1999) Reconstruction of a human skin equivalent  
859 using a spontaneously transformed keratinocyte cell line (HaCaT). *J Invest Dermatol*  
860 112: 489-98

861  
862 Bonnay F, Veloso A, Steinmann V, Kocher T, Abdusselamoglu MD, Bajaj S, Rivelles E,  
863 Landskron L, Esterbauer H, Zinzen RP, Knoblich JA (2020) Oxidative Metabolism  
864 Drives Immortalization of Neural Stem Cells during Tumorigenesis. *Cell* 182: 1490-1507  
865 e19

866  
867 Boumahdi S, Driessens G, Lapouge G, Rorive S, Nassar D, Le Mercier M, Delatte B,  
868 Caauwe A, Lenglez S, Nkusi E, Brohee S, Salmon I, Dubois C, del Marmol V, Fuks F,  
869 Beck B, Blanpain C (2014) SOX2 controls tumour initiation and cancer stem-cell  
870 functions in squamous-cell carcinoma. *Nature* 511: 246-50

871  
872 Butler A, Hoffman P, Smibert P, Papalexi E & Satija R (2018) Integrating single-cell  
873 transcriptomic data across different conditions, technologies, and species. *Nature*  
874 *Biotechnology* 36: 411–420

875  
876 Chen H, Chan DC (2017) Mitochondrial Dynamics in Regulating the Unique Phenotypes  
877 of Cancer and Stem Cells. *Cell Metab* 26: 39-48

878  
879 Der Vartanian A, Quetin M, Michineau S, Aurade F, Hayashi S, Dubois C, Rocancourt  
880 D, Drayton-Libotte B, Szegedi A, Buckingham M, Conway SJ, Gervais M, Relaix F  
881 (2019) PAX3 Confers Functional Heterogeneity in Skeletal Muscle Stem Cell  
882 Responses to Environmental Stress. *Cell Stem Cell* 24: 958-973 e9

883  
884 Di Meglio P, Duarte JH, Ahlfors H, Owens ND, Li Y, Villanova F, Tosi I, Hirota K, Nestle  
885 FO, Mrowietz U, Gilchrist MJ, Stockinger B (2014) Activation of the aryl hydrocarbon  
886 receptor dampens the severity of inflammatory skin conditions. *Immunity* 40: 989-1001  
887

888 Favaro G, Romanello V, Varanita T, Andrea Desbats M, Morbidoni V, Tezze C, Albiero  
889 M, Canato M, Gherardi G, De Stefani D, Mammucari C, Blaauw B, Boncompagni S,  
890 Protasi F, Reggiani C, Scorrano L, Salviati L, Sandri M (2019) DRP1-mediated  
891 mitochondrial shape controls calcium homeostasis and muscle mass. *Nat Commun* 10:  
892 2576

893  
894 Folmes CD, Dzeja PP, Nelson TJ, Terzic A (2012) Metabolic plasticity in stem cell  
895 homeostasis and differentiation. *Cell Stem Cell* 11: 596-606

896  
897 Foronda M, Martinez P, Schoeftner S, Gomez-Lopez G, Schneider R, Flores JM,  
898 Pisano DG, Blasco MA (2014) Sox4 links tumor suppression to accelerated aging in  
899 mice by modulating stem cell activation. *Cell Rep* 8: 487-500

900  
901 Friedman JR, Nunnari J (2014) Mitochondrial form and function. *Nature* 505: 335-43

902  
903 Fuchs E (2016) Epithelial Skin Biology: Three Decades of Developmental Biology, a  
904 Hundred Questions Answered and a Thousand New Ones to Address. *Curr Top Dev*  
905 *Biol* 116: 357-74  
906  
907 Geng Y, Yu Q, Sicinska E, Das M, Schneider JE, Bhattacharya S, Rideout WM,  
908 Bronson RT, Gardner H, Sicinski P (2003) Cyclin E ablation in the mouse. *Cell* 114:  
909 431-43  
910  
911 Giroux V, Lento AA, Islam M, Pitarresi JR, Kharbanda A, Hamilton KE, Whelan KA,  
912 Long A, Rhoades B, Tang Q, Nakagawa H, Lengner CJ, Bass AJ, Wileyto EP, Klein-  
913 Szanto AJ, Wang TC, Rustgi AK (2017) Long-lived keratin 15+ esophageal progenitor  
914 cells contribute to homeostasis and regeneration. *J Clin Invest* 127: 2378-2391  
915  
916 Gonzales KAU, Fuchs E (2017) Skin and Its Regenerative Powers: An Alliance between  
917 Stem Cells and Their Niche. *Dev Cell* 43: 387-401  
918  
919 Hao N, Lee KL, Furness SG, Bosdotter C, Poellinger L, Whitelaw ML (2012)  
920 Xenobiotics and loss of cell adhesion drive distinct transcriptional outcomes by aryl  
921 hydrocarbon receptor signaling. *Mol Pharmacol* 82: 1082-93  
922  
923 Hoppins S (2014) The regulation of mitochondrial dynamics. *Curr Opin Cell Biol* 29: 46-  
924 52  
925  
926 Hu Y, Smyth GK (2009) ELDA: extreme limiting dilution analysis for comparing depleted  
927 and enriched populations in stem cell and other assays. *J Immunol Methods* 347: 70-8  
928  
929 Hwang HC, Clurman BE (2005) Cyclin E in normal and neoplastic cell cycles.  
930 *Oncogene* 24: 2776-86  
931  
932 Iwata R, Casimir P, Vanderhaeghen P (2020) Mitochondrial dynamics in postmitotic  
933 cells regulate neurogenesis. *Science* 369: 858-862  
934  
935 Jung MH, Jung SM, Shin HS (2016) Co-stimulation of HaCaT keratinization with  
936 mechanical stress and air-exposure using a novel 3D culture device. *Sci Rep* 6: 33889  
937  
938 Kageyama Y, Zhang Z, Sesaki H (2011) Mitochondrial division: molecular machinery  
939 and physiological functions. *Curr Opin Cell Biol* 23: 427-34  
940  
941 Karantza V (2011) Keratins in health and cancer: more than mere epithelial cell  
942 markers. *Oncogene* 30: 127-38  
943  
944 Kashatus JA, Nascimento A, Myers LJ, Sher A, Byrne FL, Hoehn KL, Counter CM,  
945 Kashatus DF (2015) Erk2 phosphorylation of Drp1 promotes mitochondrial fission and  
946 MAPK-driven tumor growth. *Mol Cell* 57: 537-51  
947

- 948 Khacho M, Clark A, Svoboda DS, Azzi J, MacLaurin JG, Meghaizel C, Sesaki H,  
949 Lagace DC, Germain M, Harper ME, Park DS, Slack RS (2016) Mitochondrial Dynamics  
950 Impacts Stem Cell Identity and Fate Decisions by Regulating a Nuclear Transcriptional  
951 Program. *Cell Stem Cell* 19: 232-247  
952
- 953 Khacho M, Slack RS (2017) Mitochondrial activity in the regulation of stem cell self-  
954 renewal and differentiation. *Curr Opin Cell Biol* 49: 1-8  
955
- 956 Leclerc D, Staats Pires AC, Guillemain GJ, Gilot D (2021) Detrimental activation of AhR  
957 pathway in cancer: an overview of therapeutic strategies. *Curr Opin Immunol* 70: 15-26  
958
- 959 Li S, Park H, Trempus CS, Gordon D, Liu Y, Cotsarelis G, Morris RJ (2013) A keratin 15  
960 containing stem cell population from the hair follicle contributes to squamous papilloma  
961 development in the mouse. *Mol Carcinog* 52: 751-9  
962
- 963 Liang R, Arif T, Kalmykova S, Kasianov A, Lin M, Menon V, Qiu J, Bernitz JM, Moore K,  
964 Lin F, Benson DL, Tzavaras N, Mahajan M, Papatsenko D, Ghaffari S (2020)  
965 Restraining Lysosomal Activity Preserves Hematopoietic Stem Cell Quiescence and  
966 Potency. *Cell Stem Cell* 26: 359-376 e7  
967
- 968 Lisowski P, Kannan P, Mlody B, Prigione A (2018) Mitochondria and the dynamic  
969 control of stem cell homeostasis. *EMBO Rep* 19  
970
- 971 Liu L, Michowski W, Kolodziejczyk A, Sicinski P (2019) The cell cycle in stem cell  
972 proliferation, pluripotency and differentiation. *Nat Cell Biol* 21: 1060-1067  
973
- 974 Luecken MD, Theis FJ (2019) Current best practices in single-cell RNA-seq analysis: a  
975 tutorial. *Mol Syst Biol* 15: e8746  
976
- 977 Maga G, Hubscher U (2003) Proliferating cell nuclear antigen (PCNA): a dancer with  
978 many partners. *J Cell Sci* 116: 3051-60  
979
- 980 Magee JA, Piskounova E, Morrison SJ (2012) Cancer stem cells: impact, heterogeneity,  
981 and uncertainty. *Cancer Cell* 21: 283-96  
982
- 983 Mandal S, Freije WA, Guptan P, Banerjee U (2010) Metabolic control of G1-S transition:  
984 cyclin E degradation by p53-induced activation of the ubiquitin-proteasome system. *J*  
985 *Cell Biol* 188: 473-9  
986
- 987 Mitra K, Lippincott-Schwartz J (2010) Analysis of mitochondrial dynamics and functions  
988 using imaging approaches. *Curr Protoc Cell Biol* Chapter 4: Unit 4 25 1-21  
989
- 990 Mitra K, Rikhy R, Lilly M, Lippincott-Schwartz J (2012) DRP1-dependent mitochondrial  
991 fission initiates follicle cell differentiation during *Drosophila* oogenesis. *J Cell Biol* 197:  
992 487-97  
993

- 994 Mitra K, Wunder C, Roysam B, Lin G, Lippincott-Schwartz J (2009) A hyperfused  
995 mitochondrial state achieved at G1-S regulates cyclin E buildup and entry into S phase.  
996 Proc Natl Acad Sci U S A 106: 11960-5  
997
- 998 Moriyama M, Durham AD, Moriyama H, Hasegawa K, Nishikawa S, Radtke F, Osawa M  
999 (2008) Multiple roles of Notch signaling in the regulation of epidermal development. Dev  
1000 Cell 14: 594-604  
1001
- 1002 Morris RJ, Liu Y, Marles L, Yang Z, Trempus C, Li S, Lin JS, Sawicki JA, Cotsarelis G  
1003 (2004) Capturing and profiling adult hair follicle stem cells. Nat Biotechnol 22: 411-7  
1004
- 1005 Mulero-Navarro S, Fernandez-Salguero PM (2016) New Trends in Aryl Hydrocarbon  
1006 Receptor Biology. Front Cell Dev Biol 4: 45  
1007
- 1008 Nagdas S, Kashatus JA, Nascimento A, Hussain SS, Trainor RE, Pollock SR, Adair SJ,  
1009 Michaels AD, Sesaki H, Stelow EB, Bauer TW, Kashatus DF (2019) Drp1 Promotes  
1010 KRas-Driven Metabolic Changes to Drive Pancreatic Tumor Growth. Cell Rep 28: 1845-  
1011 1859 e5  
1012
- 1013 Orford KW, Scadden DT (2008) Deconstructing stem cell self-renewal: genetic insights  
1014 into cell-cycle regulation. Nat Rev Genet 9: 115-28  
1015
- 1016 Otsuki L, Brand AH (2018) Cell cycle heterogeneity directs the timing of neural stem cell  
1017 activation from quiescence. Science 360: 99-102  
1018
- 1019 Parker DJ, Iyer A, Shah S, Moran A, Hjelmeland AB, Basu MK, Liu R, Mitra K (2015) A  
1020 new mitochondrial pool of cyclin E, regulated by Drp1, is linked to cell-density-  
1021 dependent cell proliferation. J Cell Sci 128: 4171-82  
1022
- 1023 Pauklin S, Vallier L (2013) The cell-cycle state of stem cells determines cell fate  
1024 propensity. Cell 155: 135-47  
1025
- 1026 Prieto J, Leon M, Ponsoda X, Sendra R, Bort R, Ferrer-Lorente R, Raya A, Lopez-  
1027 Garcia C, Torres J (2016) Early ERK1/2 activation promotes DRP1-dependent  
1028 mitochondrial fission necessary for cell reprogramming. Nat Commun 7: 11124  
1029
- 1030 Purba TS, Haslam IS, Poblet E, Jimenez F, Gandarillas A, Izeta A, Paus R (2014)  
1031 Human epithelial hair follicle stem cells and their progeny: current state of knowledge,  
1032 the widening gap in translational research and future challenges. Bioessays 36: 513-25  
1033
- 1034 Ray SS, Swanson HI (2004) Dioxin-induced immortalization of normal human  
1035 keratinocytes and silencing of p53 and p16INK4a. J Biol Chem 279: 27187-93  
1036
- 1037 Ryan MT, Hoogenraad NJ (2007) Mitochondrial-nuclear communications. Annu Rev  
1038 Biochem 76: 701-22  
1039



- 1040 Sang L, Collier HA, Roberts JM (2008) Control of the reversibility of cellular quiescence  
1041 by the transcriptional repressor HES1. *Science* 321: 1095-100  
1042
- 1043 Schaefer T, Lengerke C (2020) SOX2 protein biochemistry in stemness,  
1044 reprogramming, and cancer: the PI3K/AKT/SOX2 axis and beyond. *Oncogene* 39: 278-  
1045 292  
1046
- 1047 Schoop VM, Mirancea N, Fusenig NE (1999) Epidermal organization and differentiation  
1048 of HaCaT keratinocytes in organotypic coculture with human dermal fibroblasts. *J Invest*  
1049 *Dermatol* 112: 343-53  
1050
- 1051 Schrepfer E, Scorrano L (2016) Mitofusins, from Mitochondria to Metabolism. *Mol Cell*  
1052 61: 683-694  
1053
- 1054 Senos Demarco R, Uyemura BS, D'Alterio C, Jones DL (2019) Mitochondrial fusion  
1055 regulates lipid homeostasis and stem cell maintenance in the *Drosophila* testis. *Nat Cell*  
1056 *Biol* 21: 710-720  
1057
- 1058 Serasinghe MN, Wieder SY, Renault TT, Eikholi R, Ascioffa JJ, Yao JL, Jabado O,  
1059 Hoehn K, Kageyama Y, Sesaki H, Chipuk JE (2015) Mitochondrial division is requisite  
1060 to RAS-induced transformation and targeted by oncogenic MAPK pathway inhibitors.  
1061 *Mol Cell* 57: 521-36  
1062
- 1063 Seykora JT, Cotsarelis G (2011) Keratin 15-positive stem cells give rise to basal cell  
1064 carcinomas in irradiated *Ptch1*(+/-) mice. *Cancer Cell* 19: 5-6  
1065
- 1066 Siegle JM, Basin A, Sastre-Perona A, Yonekubo Y, Brown J, Sennett R, Rendl M,  
1067 Tsirigos A, Carucci JA, Schober M (2014) SOX2 is a cancer-specific regulator of tumour  
1068 initiating potential in cutaneous squamous cell carcinoma. *Nat Commun* 5: 4511  
1069
- 1070 Simpson CL, Tokito MK, Uppala R, Sarkar MK, Gudjonsson JE, Holzbaur ELF (2021)  
1071 NIX initiates mitochondrial fragmentation via DRP1 to drive epidermal differentiation.  
1072 *Cell Rep* 34: 108689  
1073
- 1074 Siu KT, Rosner MR, Minella AC (2012) An integrated view of cyclin E function and  
1075 regulation. *Cell Cycle* 11: 57-64  
1076
- 1077 Spurlock B, Gupta P, Basu MK, Mukherjee A, Hjelmeland AB, Darley-Usmar V, Parker  
1078 D, Foxall ME, Mitra K (2019) New quantitative approach reveals heterogeneity in  
1079 mitochondrial structure-function relations in tumor initiating cells. *J Cell Sci*  
1080
- 1081 Spurlock B, Tullet J, Hartman JLt, Mitra K (2020) Interplay of mitochondrial fission-  
1082 fusion with cell cycle regulation: Possible impacts on stem cell and organismal aging.  
1083 *Exp Gerontol* 135: 110919  
1084

- 1085 Spurlock B and Mitra K (2021a) *Methods Molecular Biology*, Vol. 2275, Volkmar  
1086 Weissig and Marvin Edeas (Eds): *Mitochondrial Medicine*, 978-1-0716-1261-3,  
1087 482923\_2\_En, (Chapter 27).  
1088
- 1089 Spurlock B, Hanumanthu VS and Mitra K (2021b). Strategy of Isolating ‘Primed’ Tumor  
1090 Initiating Cells Based on Mitochondrial Transmembrane Potential. *Bio-protocol online*,  
1091 inPress.  
1092
- 1093 St John LS, Sauter ER, Herlyn M, Litwin S, Adler-Storthz K (2000) Endogenous p53  
1094 gene status predicts the response of human squamous cell carcinomas to wild-type  
1095 p53. *Cancer Gene Ther* 7: 749-56  
1096
- 1097 Street K, Risso D, Fletcher RB, Das D, Ngai J, Yosef N, Purdom E & Dudoit S (2018)  
1098 Slingshot: cell lineage and pseudotime inference for single-cell transcriptomics. *BMC*  
1099 *Genomics* 19: 477  
1100
- 1101 Stuart T, Butler A, Hoffman P, Hafemeister C, Papalexi E, Mauck WM, Hao Y,  
1102 Stoeckius M, Smibert P & Satija R (2019) Comprehensive Integration of Single-Cell  
1103 Data. *Cell* 177: 1888-1902.e21  
1104
- 1105 Subramanian A, Tamayo P, Mootha VK, Mukherjee S, Ebert BL, Gillette MA, Paulovich  
1106 A, Pomeroy SL, Golub TR, Lander ES, Mesirov JP (2005) Gene set enrichment  
1107 analysis: a knowledge-based approach for interpreting genome-wide expression  
1108 profiles. *Proc Natl Acad Sci U S A* 102: 15545-50  
1109
- 1110 Tirosh I, Izar B, Prakadan SM, Wadsworth MH, Treacy D, Trombetta JJ, Rotem A,  
1111 Rodman C, Lian C, Murphy G, *et al* (2016) Dissecting the multicellular ecosystem of  
1112 metastatic melanoma by single-cell RNA-seq. *Science* 352: 189–196  
1113
- 1114 Tanwar DK, Parker DJ, Gupta P, Spurlock B, Alvarez RD, Basu MK, Mitra K (2016)  
1115 Crosstalk between the mitochondrial fission protein, Drp1, and the cell cycle is identified  
1116 across various cancer types and can impact survival of epithelial ovarian cancer  
1117 patients. *Oncotarget* 7: 60021-60037  
1118
- 1119 Teixeira LK, Reed SI (2017) Cyclin E Deregulation and Genomic Instability. *Adv Exp*  
1120 *Med Biol* 1042: 527-547  
1121
- 1122 Tsuyoshi H, Orisaka M, Fujita Y, Asare-Werehene M, Tsang BK, Yoshida Y (2020)  
1123 Prognostic impact of Dynamin related protein 1 (Drp1) in epithelial ovarian cancer. *BMC*  
1124 *Cancer* 20: 467  
1125
- 1126 van Velthoven CTJ, Rando TA (2019) Stem Cell Quiescence: Dynamism, Restraint, and  
1127 Cellular Idling. *Cell Stem Cell* 24: 213-225  
1128
- 1129 Twig G, Shirihai OS (2011) The interplay between mitochondrial dynamics and  
1130 mitophagy. *Antioxid Redox Signal* 14: 1939-51

1131  
1132 Vantaggiato C, Castelli M, Giovarelli M, Orso G, Bassi MT, Clementi E, De Palma C  
1133 (2019) The Fine Tuning of Drp1-Dependent Mitochondrial Remodeling and Autophagy  
1134 Controls Neuronal Differentiation. *Front Cell Neurosci* 13: 120  
1135  
1136 Wincent E, Bengtsson J, Mohammadi Bardbori A, Alsberg T, Luecke S, Rannug U,  
1137 Rannug A (2012) Inhibition of cytochrome P4501-dependent clearance of the  
1138 endogenous agonist FICZ as a mechanism for activation of the aryl hydrocarbon  
1139 receptor. *Proc Natl Acad Sci U S A* 109: 4479-84  
1140  
1141 Wu MJ, Chen YS, Kim MR, Chang CC, Gampala S, Zhang Y, Wang Y, Chang CY,  
1142 Yang JY, Chang CJ (2019) Epithelial-Mesenchymal Transition Directs Stem Cell  
1143 Polarity via Regulation of Mitofusin. *Cell Metab* 29: 993-1002 e6  
1144  
1145 Xie Q, Wu Q, Horbinski CM, Flavahan WA, Yang K, Zhou W, Dombrowski SM, Huang  
1146 Z, Fang X, Shi Y, Ferguson AN, Kashatus DF, Bao S, Rich JN (2015) Mitochondrial  
1147 control by DRP1 in brain tumor initiating cells. *Nat Neurosci* 18: 501-10  
1148  
1149 Zerjatke T, Gak IA, Kirova D, Fuhrmann M, Daniel K, Gonciarz M, Muller D, Glauche I,  
1150 Mansfeld J (2017) Quantitative Cell Cycle Analysis Based on an Endogenous All-in-One  
1151 Reporter for Cell Tracking and Classification. *Cell Rep* 19: 1953-1966  
1152  
1153 Zhang H, Menzies KJ, Auwerx J (2018) The role of mitochondria in stem cell fate and  
1154 aging. *Development* 145  
1155  
1156 Zhao Q, Yan S, Lu J, Parker DJ, Wu H, Sun Q, Crossman DK, Liu S, Wang Q, Sesaki  
1157 H, Mitra K, Liu K, Jiao K (2021) Mitochondrial Fission Regulates Transcription of  
1158 Ribosomal Protein Genes in Embryonic Hearts  
1159 bioRxiv 2021.02.10.430627; doi: <https://doi.org/10.1101/2021.02.10.430627>  
1160  
1161 Zhong X, Cui P, Cai Y, Wang L, He X, Long P, Lu K, Yan R, Zhang Y, Pan X, Zhao X, Li  
1162 W, Zhang H, Zhou Q, Gao P (2019) Mitochondrial Dynamics Is Critical for the Full  
1163 Pluripotency and Embryonic Developmental Potential of Pluripotent Stem Cells. *Cell*  
1164 *Metab* 29: 979-992 e4  
1165

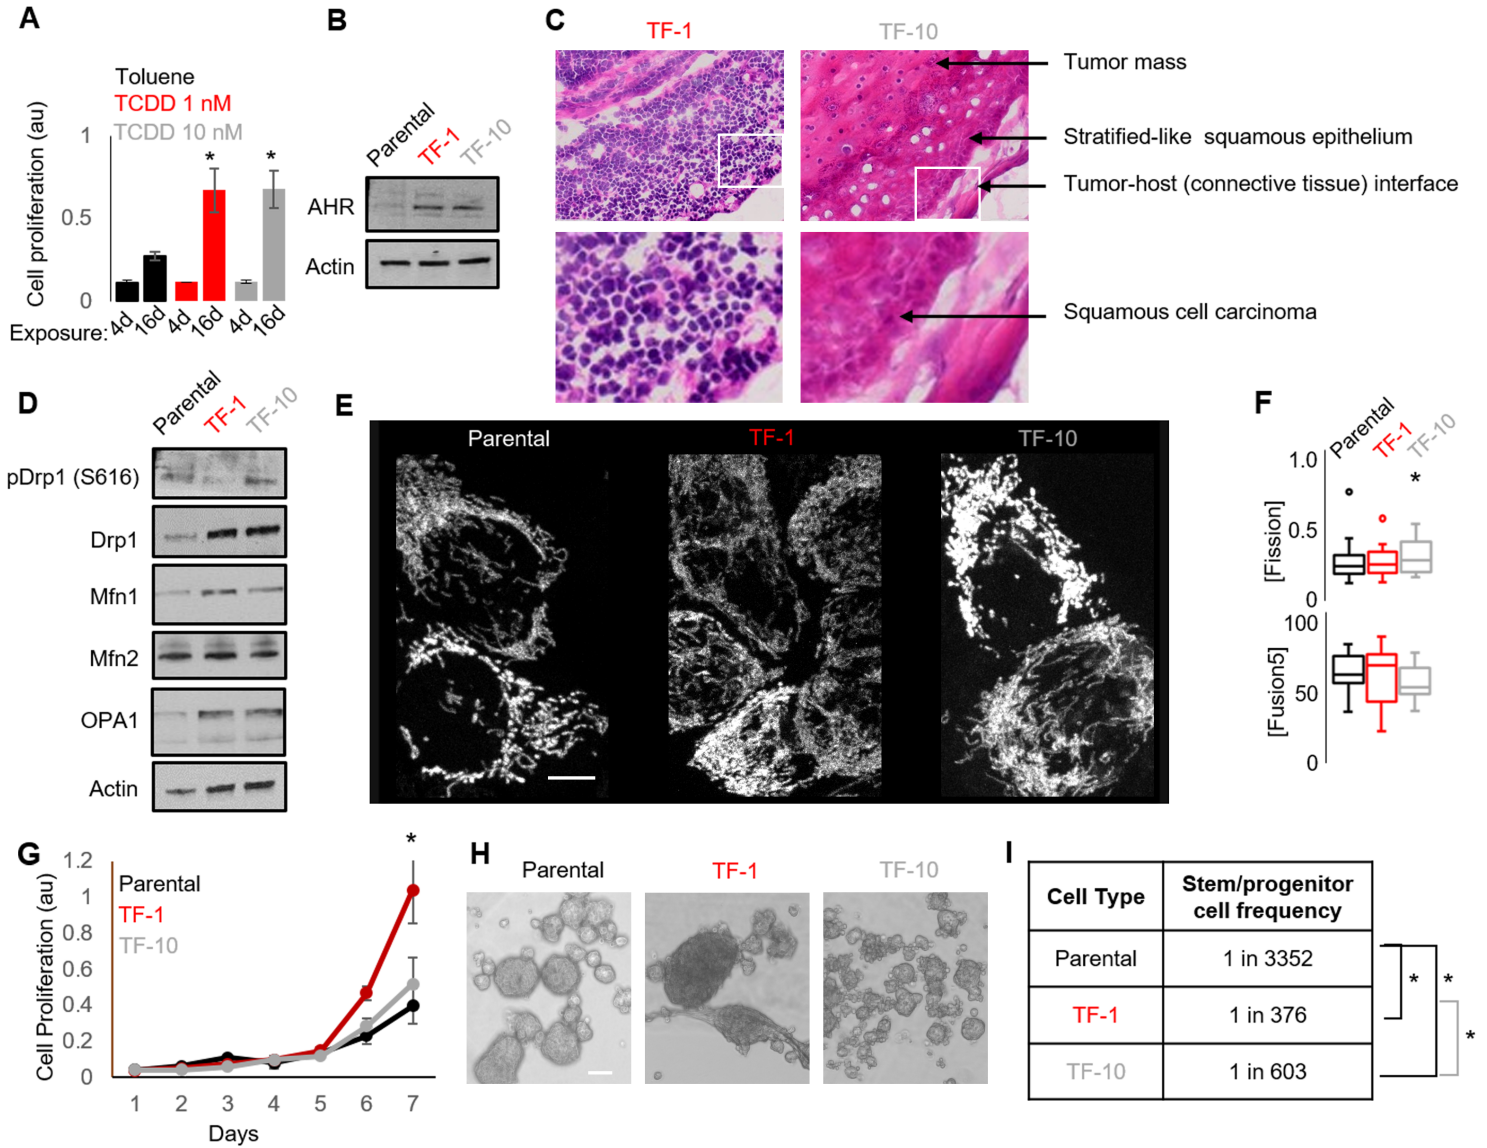

**Figure 1**

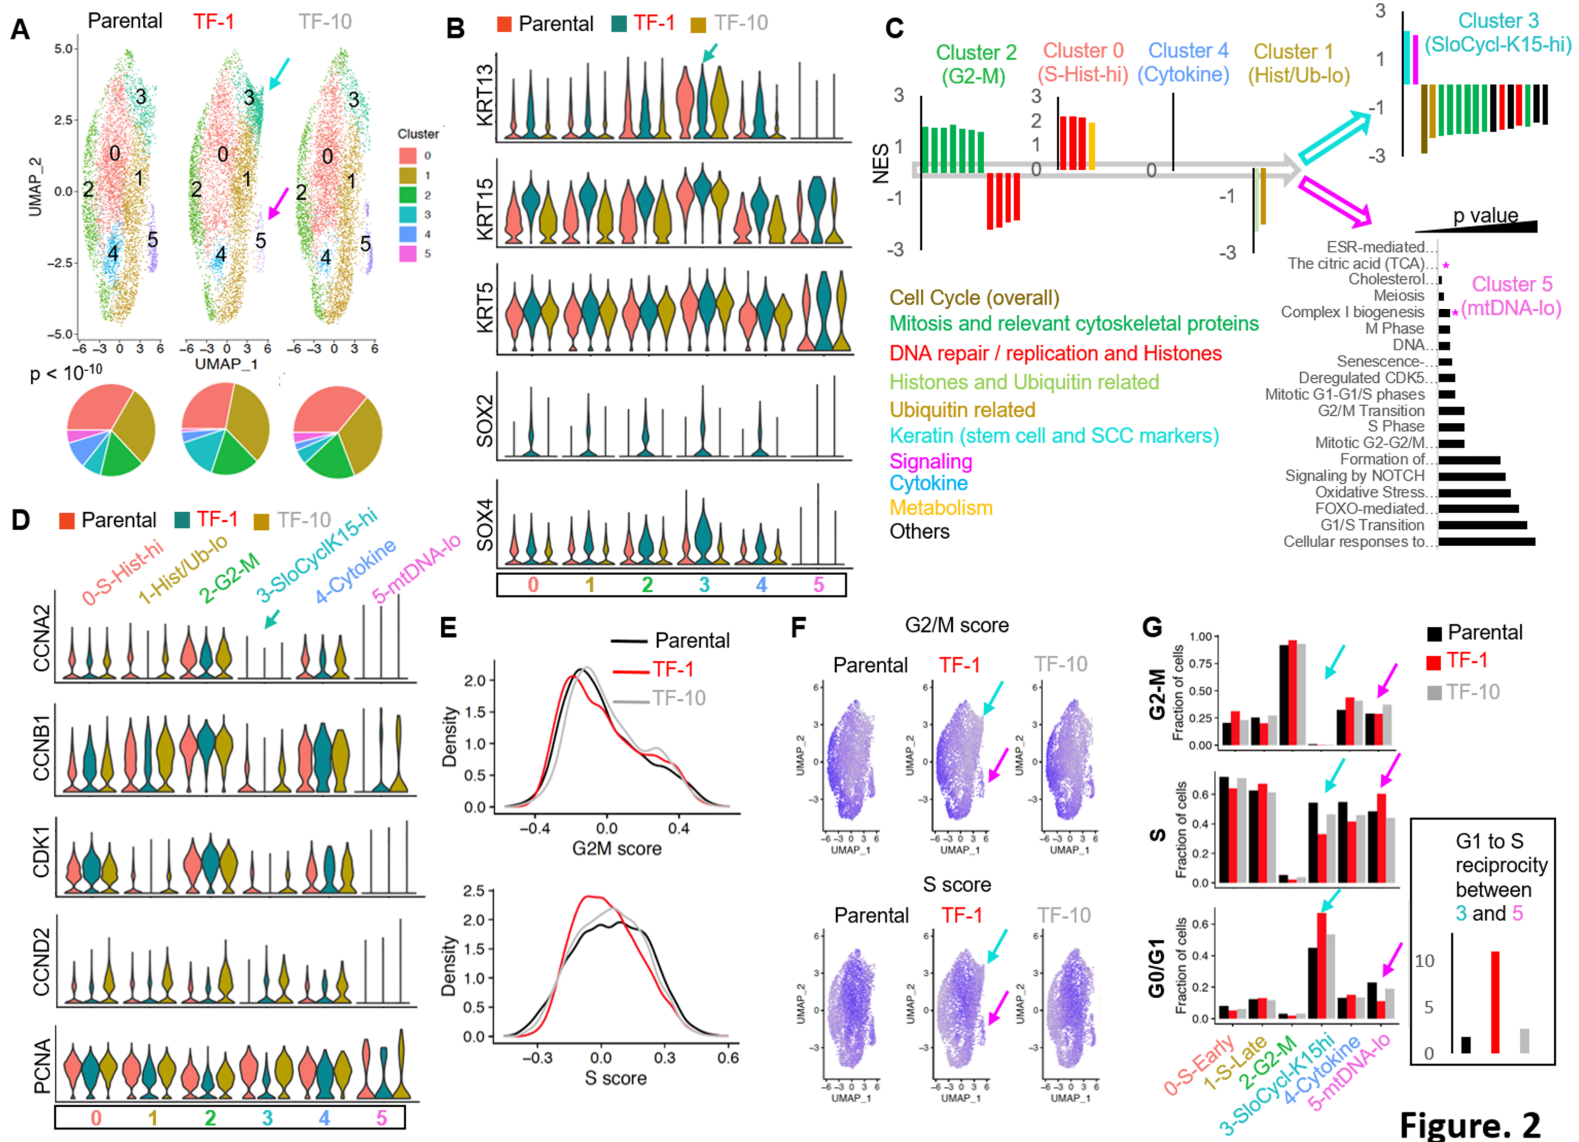

Figure. 2



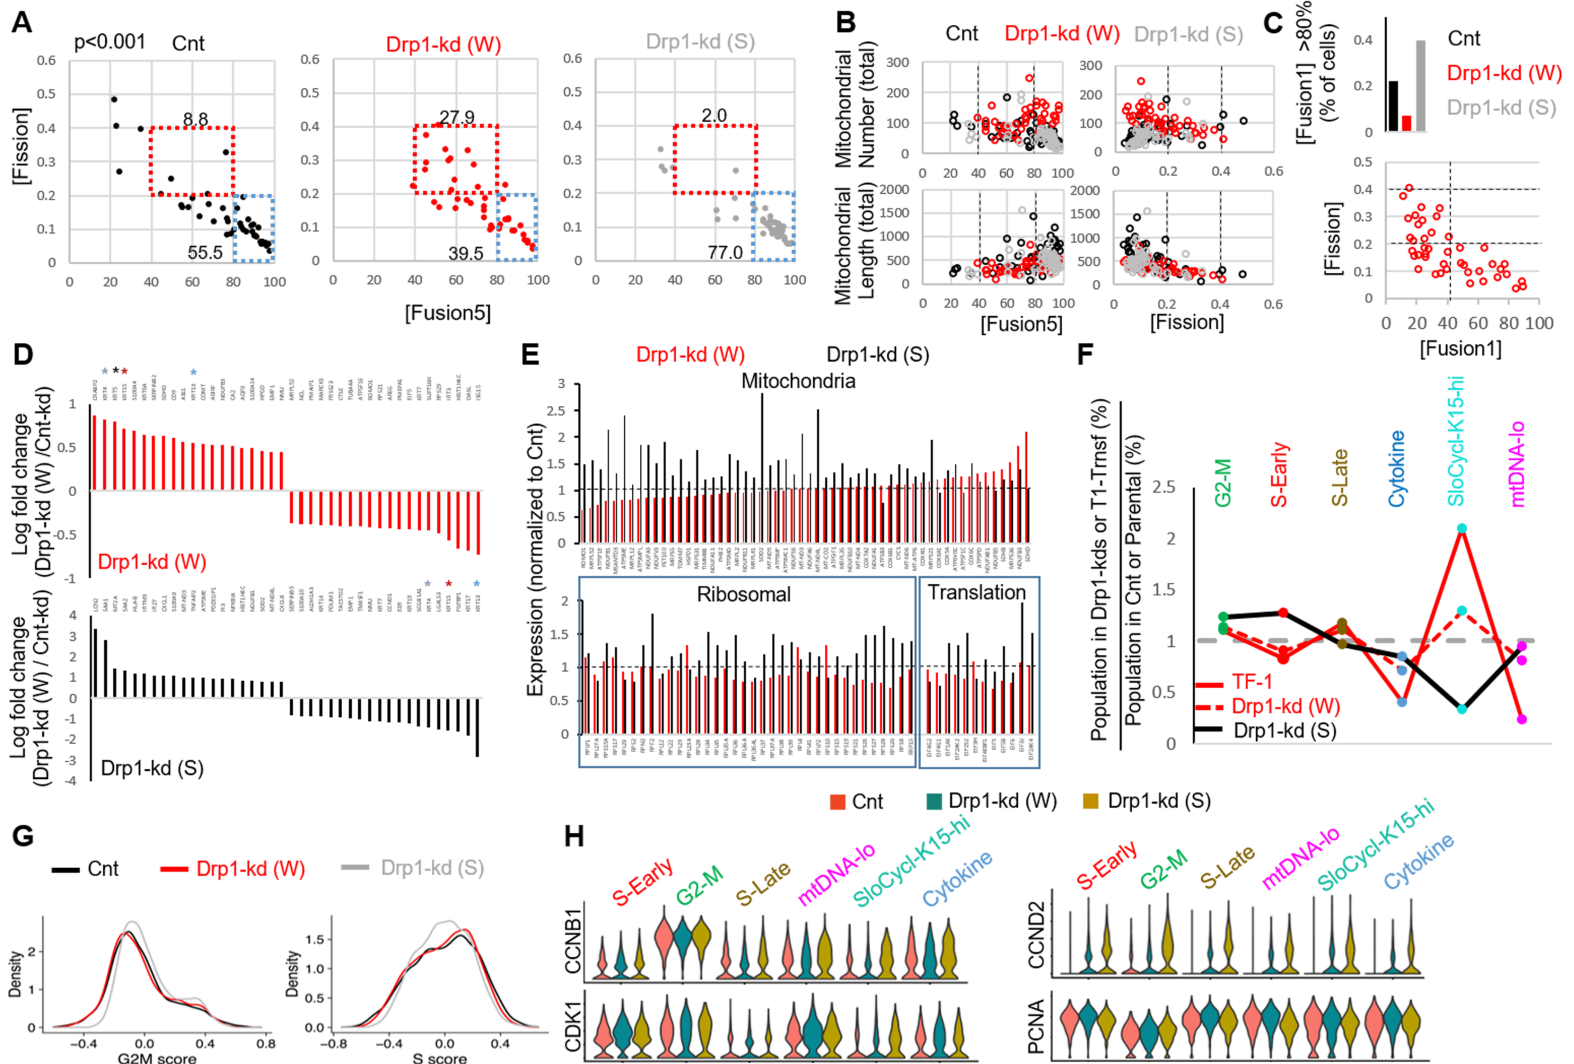

**Figure. 4**

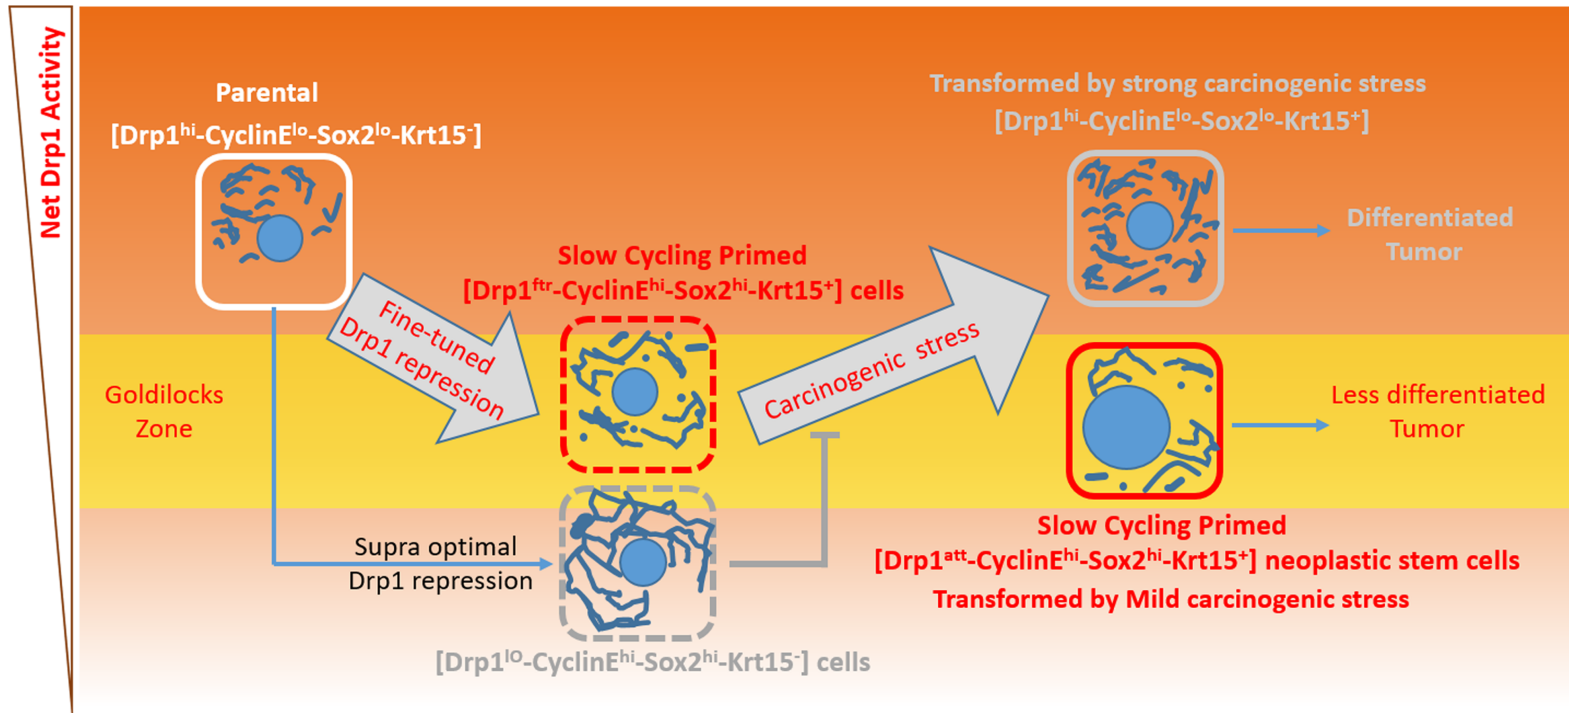

Figure. 5



**A**

| Cells Injected | Tumor incidence | Tumor volume    |
|----------------|-----------------|-----------------|
| Parental       | 0/9             | N.A.            |
| TF-1           | #1/9            | 188.1<br>#363.1 |
| TF-10          | 3/9             | 287.9<br>± 173  |

**B**

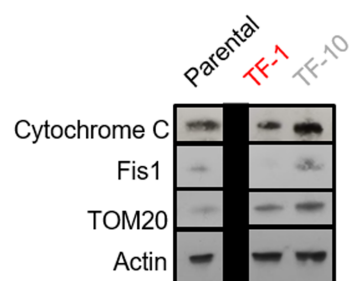

**Extended Fig. 1**

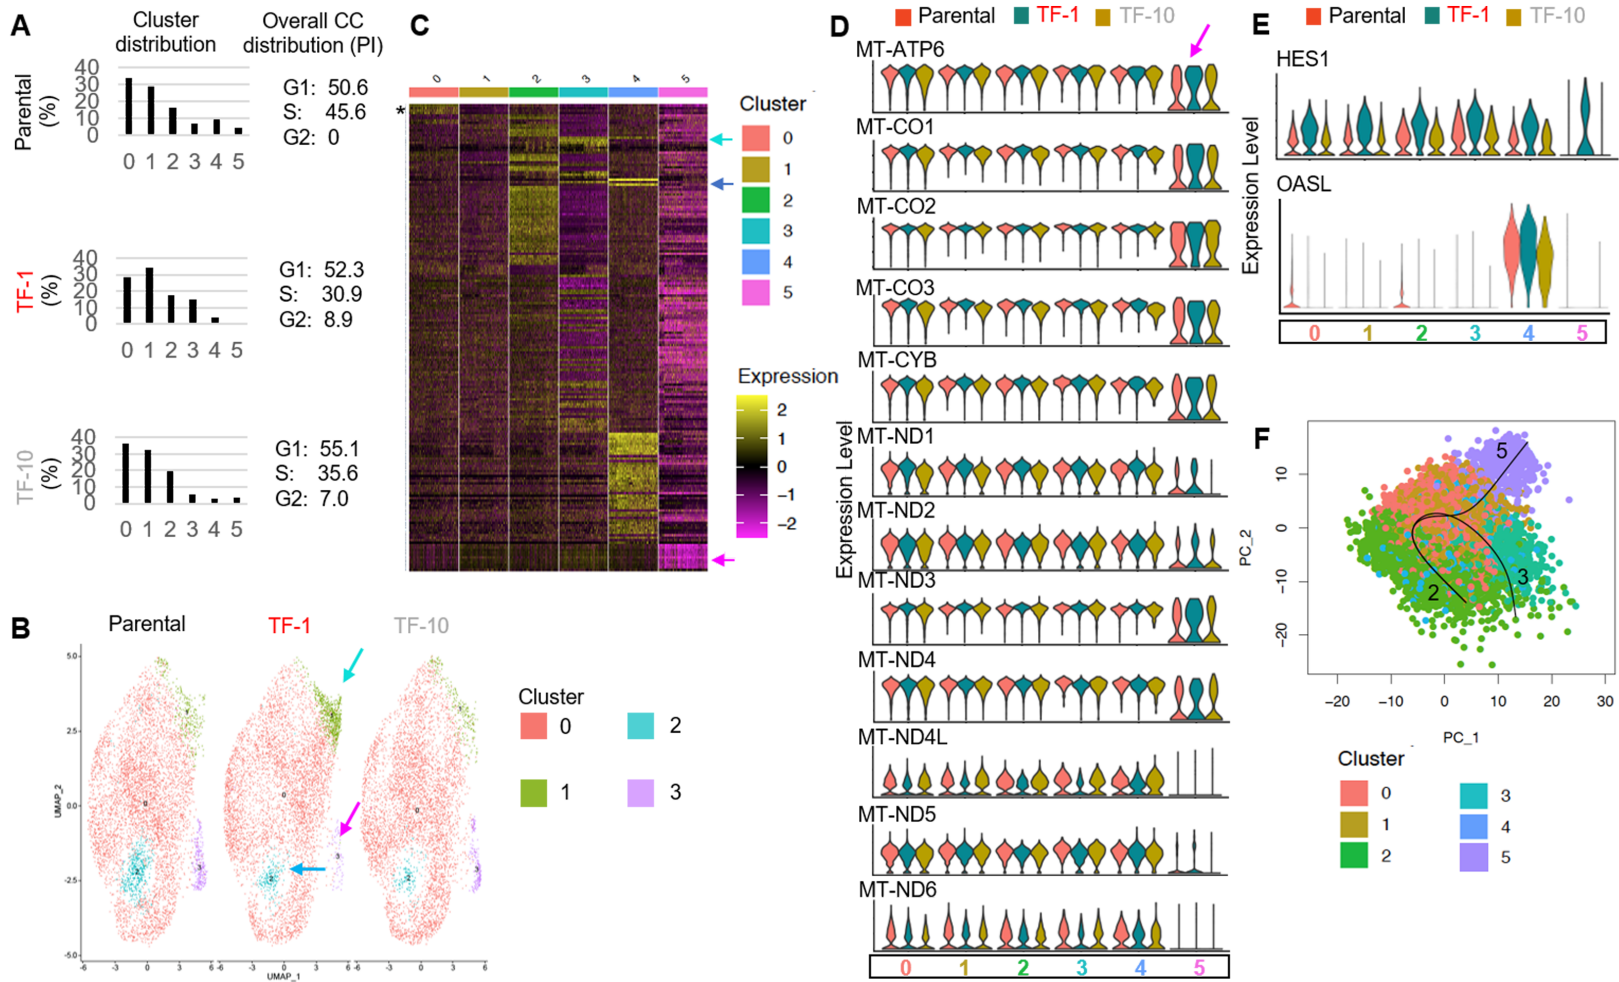

**Extended Fig. 2**

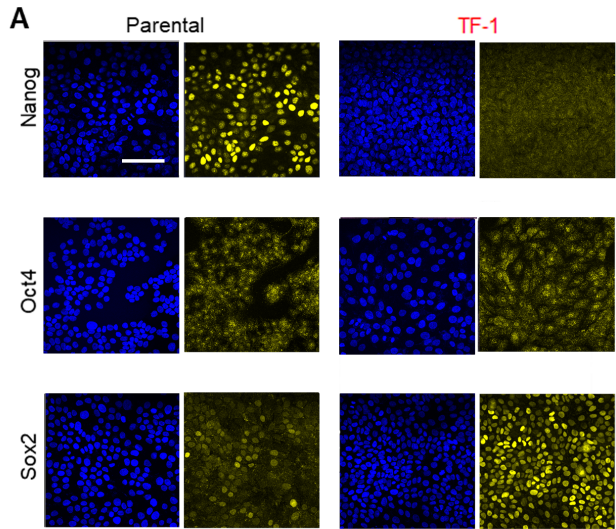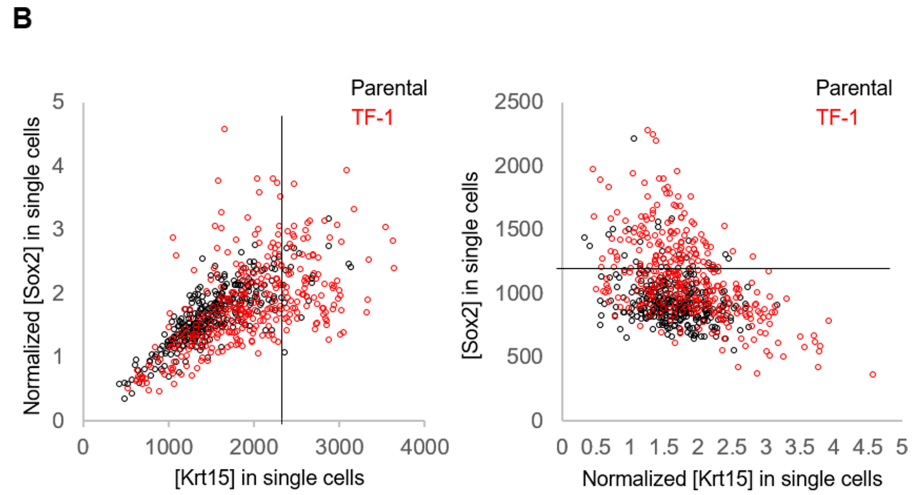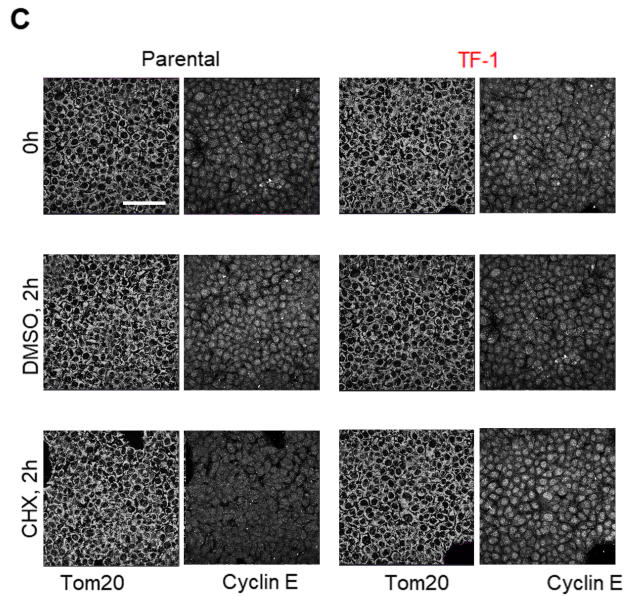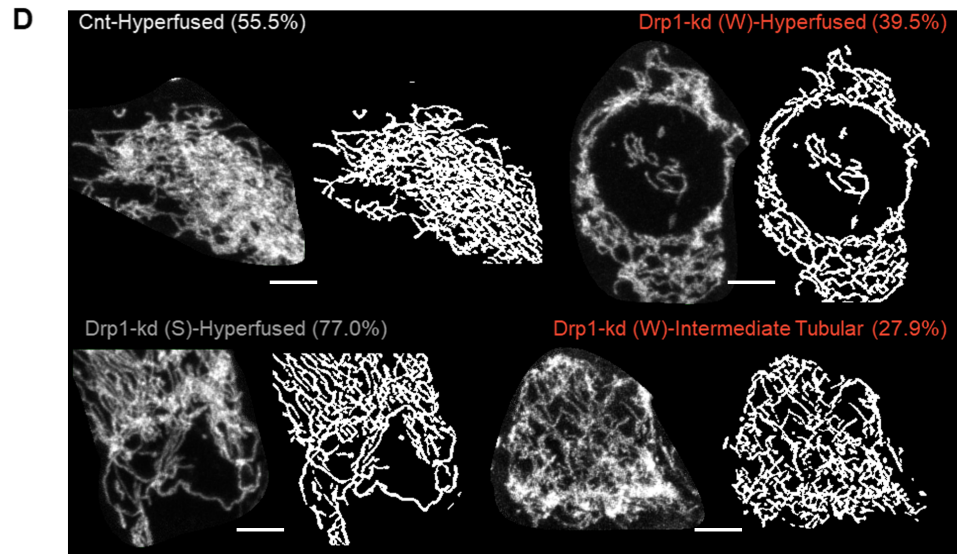

Extended Fig. 3

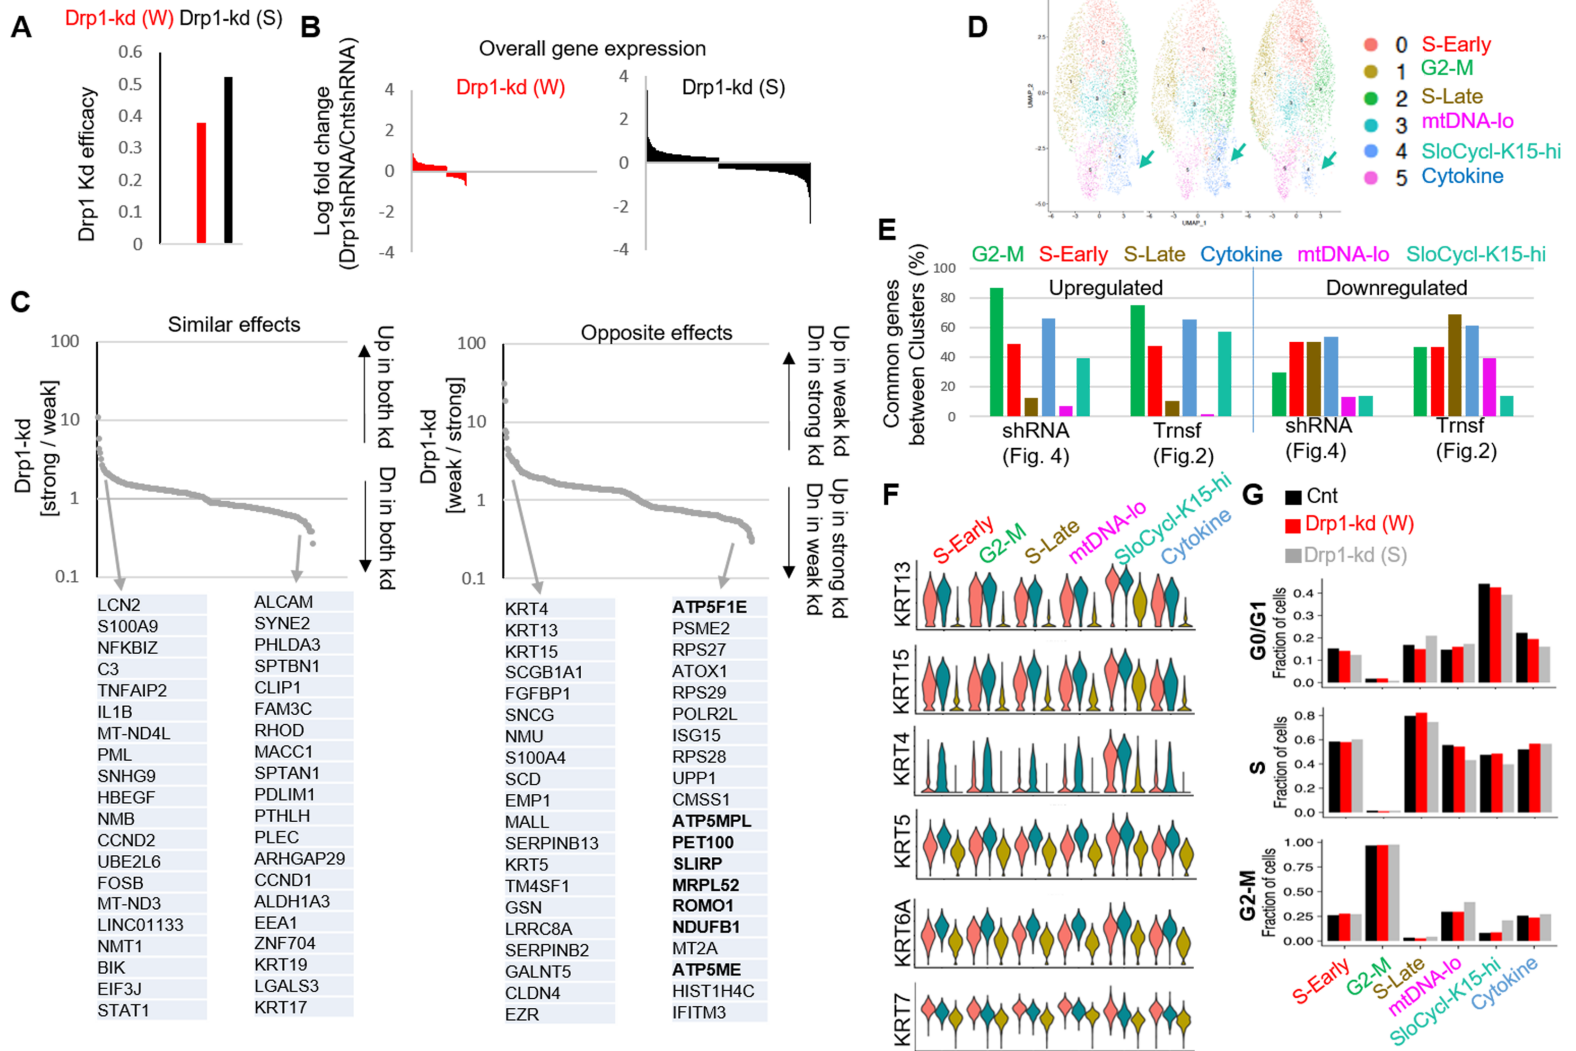

Extended Fig. 4

795 **EXTENDED FIGURE LEGENDS:**

796 **Extended Figure 1. A)** Quantification of incidence and volume of xenograft tumors  
797 formed by TF-1 and TF-10 HaCaT cells; # indicates presence of a distant tumor. **B)**  
798 Immunoblot analyses of Cytochrome C, Fis1, Tom20 and actin (loading control) in  
799 Parental and TF-1 and TF-10 HaCaT cells.

800 **Extended Figure 2. A)** Bar plot showing the percentage distribution of the clusters (0-5)  
801 in each of the cell populations identified by scRNA-seq analyses of Parental, TF-1 and  
802 TF-10 HaCaT cells (left); numbers show cell cycle distribution from flowcytometry  
803 analyses of PI stained cells in the corresponding population (right). **B)** UMAP plot of  
804 scRNA-seq derived clusters (0-5) of Parental, TF-1 and TF-10 HaCaT cells obtained  
805 with minimum cluster resolution; color coded arrows point the major change in cluster  
806 distribution in transformed cells. **C)** Heat map of statistically significant marker genes for  
807 the color-coded clusters (0-5) of Parental, TF-1 and TF-10 HaCaT cells; color coded  
808 arrows point to the top most marker gene in the 3 clusters that are have different  
809 distribution between the Parental and transformed populations; color index shows log  
810 fold change; \* marks the Histone gene cluster. **D)** Violin plots depicting expression of  
811 the mt-DNA genes in the named scRNA-seq derived cell clusters in the Parental, TF-1  
812 and TF-10 HaCaT cells. **E)** Violin plots depicting expression of HES1 and OASL genes  
813 in the named scRNA-seq derived cell clusters in the Parental, TF-1 and TF-10 HaCaT  
814 cells. **F)** PCA plot of trajectory analyses of the scRNA-seq derived cell clusters in the  
815 Parental, TF-1 and TF-10 HaCaT cells.

816 **Extended Figure 3. A)** Representative confocal micrographs of immunostained  
817 Parental and TF-1 HaCaT cells showing endogenous expression of Oct4, Nanog and  
818 Sox2; blue depicting nuclear staining with Hoechst. **B)** Dot plot of [Sox2] and [Krt15]  
819 obtained from confocal micrographs of co-immunostained Parental and TF-1 HaCaT  
820 cells; [Sox2] levels normalized to the minimum in the respective population (left) and  
821 [Krt15] levels normalized to the minimum in the respective population (right); black lines  
822 demarcate levels of Sox2 and Krt15 as determined from the normalized signal of the  
823 other. **C)** Representative confocal micrographs of Parental and TF-1 HaCaT cells  
824 showing endogenous expression of Tom20 and Cyclin E1 after 2 hours incubation with

825 DMSO or Cycloheximide, with the pre-incubation time point (0h) as control. **D)**  
826 Representative maximum intensity projections (MIP) of confocal optical sections  
827 (micrograph) and the corresponding MitoGraph generated binary images (binary) for  
828 quantifying [Fission] and [Fusion1/5] metrics of the Parental HaCaT cells expressing  
829 non-targeted shRNA (Cnt), strong (S) or weak (W) Drp1 shRNA; the cells represent  
830 populations in colored boxes in Fig. 4A while the number depicts their abundance in  
831 percentage. Scale bar depicts 100  $\mu\text{m}$  (A, C) or 15  $\mu\text{m}$  (D).

832 **Extended Figure 4. A)** Bar plot showing the knockdown efficiency of strong (S) or weak  
833 (W) Drp1 shRNA expressed as ratio of Drp1 transcript levels in the knockdown HaCaT  
834 and that of the cells expressing the non-targeted shRNA control. **B)** Bar plot showing  
835 log fold change of overall gene expression of Parental HaCaT cells expressing strong  
836 (S) or weak (W) Drp1 shRNA with respect to those expressing the non-targeted shRNA  
837 (Cnt). **C)** Plots showing ratio of the expression of covered genes between the Parental  
838 HaCaT cells expressing strong (S) or weak (W) Drp1 shRNA; “Similar effects” showing  
839 ratio of increase or decrease in the (S) Drp1 shRNA over the (W) Drp1 shRNA (back  
840 arrows in left panel), while opposite effects showing opposite trends in genes as  
841 labelled in the arrows (back arrows right panel); grey arrows point to the top 20 genes of  
842 each category. **D)** UMAP plot of scRNA-seq based clusters (0-5) of Parental HaCaT  
843 cells expressing non-targeted shRNA (Cnt), strong (S) or weak (W) Drp1 shRNA; arrow  
844 pointing the SloCyc-Krt15-hi cluster (note color coding is not same as the one presented  
845 in Fig. 2). **E)** Bar plot showing percentage of statistically significant common genes  
846 (Upregulated or Downregulated) between color coded clusters obtained with the  
847 scRNA-seq data set of parental and transformed HaCaT cells (Fig. 2) and that of  
848 parental expressing control or Drp1 shRNAs (Fig. 4); same color coding is maintained  
849 between the two data sets. **F)** Violin plots depicting expression of Krt13, Krt15, Krt4,  
850 Krt5, Krt6A, Krt7 genes in the named scRNA-seq based cell clusters in the Parental  
851 HaCaT cells expressing non-targeted shRNA (Cnt), strong (S) or weak (W) Drp1  
852 shRNA. **G)** Bar plot showing fraction of cells in G2-M, S and G0/G1, computed from  
853 main Fig. 4G, in the functionally categorized clusters in the Parental cells expressing  
854 non-targeted shRNA (Cnt), strong (S) or weak (W) Drp1 shRNA.

855
